# Supplementary material for: The association between childhood cognitive ability and adult long-term sickness absence in three British birth cohorts: a cohort study
Source: PubMed Central journal article supplement — BMJ Open. 2012 Apr 1;2(2):e000777. doi: 10.1136/bmjopen-2011-000777 (PMC3323804; doi:10.1136/bmjopen-2011-000777), 2012-04-01
Supplement: bmjopen-2011-000777.draft_revisions.pdf [file bmjopen-2011-000777.draft_revisions.pdf]

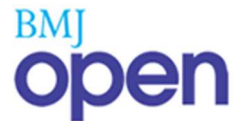

**The association between childhood cognitive ability and adult long term sickness absence in 3 British birth cohorts**

|                                 |                                                                                                                                                                                                                                                                                                                           |
|---------------------------------|---------------------------------------------------------------------------------------------------------------------------------------------------------------------------------------------------------------------------------------------------------------------------------------------------------------------------|
| Journal:                        | <i>BMJ Open</i>                                                                                                                                                                                                                                                                                                           |
| Manuscript ID:                  | bmjopen-2011-000777                                                                                                                                                                                                                                                                                                       |
| Article Type:                   | Research                                                                                                                                                                                                                                                                                                                  |
| Date Submitted by the Author:   | 20-Dec-2011                                                                                                                                                                                                                                                                                                               |
| Complete List of Authors:       | HENDERSON, MAX; INSTITUTE OF PSYCHIATRY, KINGS COLLEGE LONDON, PSYCHOLOGICAL MEDICINE<br>Richards, Marcus; MRC Unit for Lifelong Health and Aging, Stansfeld, Stephen; Barts and the London, Queen Marys School of Medicine and Dentistry, Neurology<br>Hotopf, Matthew; King's College London (Institute of Psychiatry), |
| <b>Primary Subject Heading</b>: | Occupational and environmental medicine                                                                                                                                                                                                                                                                                   |
| Secondary Subject Heading:      | Public health, Epidemiology                                                                                                                                                                                                                                                                                               |
| Keywords:                       | OCCUPATIONAL & INDUSTRIAL MEDICINE, EPIDEMIOLOGY, PUBLIC HEALTH                                                                                                                                                                                                                                                           |
|                                 |                                                                                                                                                                                                                                                                                                                           |

SCHOLARONE™  
Manuscripts

1  
2  
3 The association between childhood cognitive ability and adult long term sickness absence in 3 British  
4 birth cohorts  
5  
6

7 Dr Max Henderson \*  
8 Senior Lecturer in Epidemiological & Occupational Psychiatry  
9 Institute of Psychiatry, Kings College London  
10 Department of Psychological Medicine  
11 Weston Education Centre, Cutcombe Road  
12 London SE5 9RJ  
13 UK  
14

15 Professor Marcus Richards  
16 Programme Leader  
17 MRC Unit for Lifelong Health and Aging  
18 33 Bedford Place  
19 London WC1B 5JU  
20 UK  
21  
22

23 Professor Stephen Stansfeld  
24 Professor of Psychiatry  
25 Centre for Psychiatry  
26 Wolfson Institute for Preventive Medicine  
27 Barts and the London School of Medicine and Dentistry  
28 London EC1M 6BQ  
29 UK  
30  
31

32 Professor Matthew Hotopf  
33 Professor of General Hospital Psychiatry  
34 Institute of Psychiatry, Kings College London  
35 Department of Psychological Medicine  
36 Weston Education Centre, Cutcombe Road  
37 London SE5 9RJ  
38 UK  
39  
40  
41  
42

43 \* corresponding author

44 T: 020 3228 8564

45 F: 020 7848 5408

46 E: max.j.henderson@kcl.ac.uk  
47  
48  
49  
50  
51  
52  
53  
54  
55  
56  
57  
58  
59  
60

1  
2  
3 ABSTRACT  
4

5 Objectives  
6

7  
8 We aimed to test the relationship between childhood cognitive function and long term sick leave in  
9  
10 adult life, and to examine whether any relationship was mediated by educational attainment, adult  
11  
12 social class or adult mental ill health.  
13

14 Design, setting, and participants  
15

16  
17 We used data from the 1946, 1958 and 1970 British birth cohorts. We examined the association  
18  
19 between cognitive function assessed at age 10/11 with long term sick leave at age 53, 42 and 34  
20  
21 respectively.  
22

23 Results  
24

25  
26 After adjusting for sex and parental social class lower cognitive function was associated with greater  
27  
28 odds of being long term sick in all three cohorts with evidence of a dose-response effect. Educational  
29  
30 attainment appeared to partly mediate the associations in all cohorts; adult social class appeared to  
31  
32 have a mediating role in the 1946 cohort. Adjusting for depression had little effect.  
33

34 Conclusions  
35

36  
37 Long term sick leave is a complex outcome with many risk factors beyond health. Cognitive abilities  
38  
39 might impact on the way individuals are able to develop strategies to maintain their employment or  
40  
41 rapidly find new employment when faced with a range of difficulties. Education should form part of  
42  
43 the policy response to long term sick leave such that young people are better equipped with skills  
44  
45 needed in a flexible labour market.  
46

47  
48 (word count = 211)  
49  
50  
51  
52  
53  
54  
55  
56  
57  
58  
59  
60

1  
2  
3 SUMMARY  
4  
5  
6  
7

8 ARTICLE FOCUS  
9

10 [1] The association between disease severity and long term sick leave is weak; individual risk factors  
11 including those identifiable before starting work are under-researched  
12  
13

14 [2] Lower IQ may be one such risk factor and we used data from the 3 British birth cohorts now if  
15 working age to look at the association between cognitive ability in childhood and long term sick leave  
16  
17 in adult life  
18  
19

20 [3] We also looked at the extent to which any such association could be mediated by educational  
21 attainment, adult social class, or adult mental ill health  
22  
23  
24  
25  
26  
27

28 KEY MESSAGES  
29

30 [1] After adjusting for sex and parental social class lower cognitive function was associated with  
31 greater odds of being long term sick in all three cohorts (OR= approx 2 in all 3 cohorts, with clear  
32 dose:response effect)  
33  
34  
35  
36

37 [2] Educational attainment appeared to partly mediate the associations in all cohorts  
38  
39

40 [3] The effect of lower cognitive ability is independent of mental ill health and adult social class  
41  
42  
43  
44

45 STRENGTHS & LIMITATIONS  
46

47 Strengths  
48

49 [1] We have used data from 3 well established birth cohorts and used imputation to deal with missing  
50 data  
51  
52  
53  
54  
55  
56  
57  
58  
59  
60

1  
2  
3 [2] our data includes those born in the 40s, 50s and 70s who were in their 50s, 40s and 30s at the point  
4  
5 the outcome was measured - our results transcend age and period effects  
6

7 Weaknesses  
8

9  
10 [1] There is likely to be some effect from residual confounding from unmeasured variables acting in  
11  
12 early life which might influence both childhood cognitive ability and adult ill-health.  
13

14 [2] the outcome was assessed by receipt of incapacity benefit in the '58 and '70 cohorts but a different  
15  
16 measure in the '46. different measures of depression are available in each cohort  
17  
18  
19  
20  
21  
22  
23  
24  
25  
26  
27  
28  
29  
30  
31  
32  
33  
34  
35  
36  
37  
38  
39  
40  
41  
42  
43  
44  
45  
46  
47  
48  
49  
50  
51  
52  
53  
54  
55  
56  
57  
58  
59  
60

## BACKGROUND

In the UK over 2.5 million people are in receipt of Incapacity Benefit (IB), most often paid to those off work for more than 6 months due to ill health<sup>1</sup>. The cost to the economy from reduced tax revenues and payment of benefits is in excess of £50 billion per year<sup>2</sup>. Reducing long term sick leave is thus high on the agenda for policy makers<sup>3,4</sup>. Long term sick leave increases poverty in the sick, and is associated with premature mortality<sup>5-7</sup>. At the individual level long term sick leave means a loss of income and dignity, and with this a reduced opportunity for social participation<sup>2</sup>. 50% of those in receipt of IB have been claiming for more than 5 years, and those claiming for 2 years are more likely to die or retire than get another job<sup>8</sup>. Long term sick leave increases and sustains poverty and social disadvantage.

Mental and musculoskeletal disorders are the most common reasons to be awarded IB<sup>2,9,10</sup>. Much of the policy response to sickness absence has focussed on reducing occupational risk factors for these disorders. However there is a disconnect between the increase in incapacity benefit certifications and the distribution of risk factors in the workplace. Musculoskeletal disorders rose at a time when the physical demands of work decreased<sup>11</sup>, and workplaces became increasingly safe<sup>12</sup>. Similarly the increase in IB awards due to psychiatric disorders was not associated with a concomitant rise in the prevalence of these disorders within the working age population. Further, the relationship between health and occupational function is unclear - whilst there are 2.5 million people in the UK on IB, over 3 million people with a range of disabilities manage to remain in paid work<sup>13</sup>.

Relatively few studies have examined individual, as opposed to occupational, risk factors for long term sick leave<sup>14</sup>. Some difficulties apparent in childhood are associated: data from the Aberdeen Children of the Nineteen Fifties Cohort<sup>15</sup> indicated that emotional or behavioural difficulties were associated with being permanently sick or disabled nearly 40 years later. Similar findings have been shown for adolescent mental disorders in a Swedish cohort<sup>16</sup>. Another early risk factor might be cognitive ability: the Aberdeen study indicated that low cognitive ability independently predicted being permanently sick or disabled in adult life. Work by Gravseth found that low birth weight and a

1  
2  
3 failure to complete secondary education predicted the award of a disability pension in a cohort of  
4 Norwegians born between 1967 and 1976<sup>17</sup>. The same author has shown that lower intellectual  
5 performance at age 18 or 19, and educational attainment at age 23 were each independently associated  
6 with the award of a disability pension to Norwegian men between the ages of 24 and 36<sup>18</sup>.  
7  
8

9  
10  
11 Low IQ might explain the association of both childhood behavioural problems and poor educational  
12 attainment with long term sickness absence in adult life. If this were the case, a response at policy  
13 level which emphasised the attributed health reasons for long term sick leave and responded by trying  
14 to improve the health “offer” to this group may be less than successful. By contrast one that looked  
15 beyond a diagnostic label and emphasised skills and training, especially tailored to the needs of the  
16 least cognitively able, might produce better results.  
17  
18  
19

20 We tested the hypothesis that lower cognitive ability is a risk factor for long term sickness absence in  
21 three British birth cohorts. We further aimed to determine whether such an association is mediated by  
22 educational attainment, adult social class, or adult mental health.  
23  
24

## 25 METHODS

26 We used data from the 3 British birth cohorts whose participants are now working age<sup>19</sup>.  
27  
28

### 29 *The National Survey of Health and Development*

30  
31  
32 The 1946 National Survey of Health and Development (NSHD) obtained information on all singleton  
33 births to married women in England Scotland and Wales in a single week in March 1946<sup>20</sup>. An initial  
34 sample of 5362 were then followed up, comprising all those with fathers in non-manual and  
35 agricultural employment and a 1:4 sample of those with fathers in manual employment. The cohort is  
36 described in detail elsewhere<sup>20</sup>. In 1999, 3760 of the 5362 were alive, living in the UK and were not  
37 permanent refusals. Of these 3035 (81%) provided data to the study. This group (weighted to adjust  
38 for the sampling procedure) are broadly representative of the population born in 1946 in the UK,  
39 although there was over-representation among non-responders of the never married and the least  
40 advantaged in terms of cognitive ability, educational attainment, and social class<sup>21</sup>.  
41  
42  
43  
44  
45  
46  
47  
48  
49  
50  
51  
52  
53  
54  
55  
56  
57  
58  
59  
60

### *The National Child Development Study*

The 1958 National Childhood Development Study (NCDS) included all surviving children born in England Scotland and Wales in a single week in March 1958. During follow-up ‘sweeps’ immigrant children who would have been part of the study had they been born in the UK were added. The cohort is described in detail elsewhere<sup>22</sup>. In 2000, 16147 were still eligible to take part and 11419 (71%) contributed data.

### *The British Cohort Study*

The 1970 British Cohort Study (BCS) included all live births in one week in April 1970 in the whole United Kingdom. Children born in Northern Ireland were subsequently dropped from follow-up. The cohort is described in detail elsewhere<sup>23</sup>. In 2004, excluding those who had died, emigrated, been born in Northern Ireland or were permanent refusals 16875 were eligible to take part of whom 9656 (59%) contributed data.

### *Outcome*

In all cohorts data on the outcome, long term sick leave, were extracted from the most recent dataset at the time the present project began: for the 1946 cohort this was in 1999 when participants were aged 53 years; for the 1958 cohort in 2000, when participants were aged 42, and in the 1970 cohort in 2004, when participants were aged 34.

In both the 1958 and 1970 cohort, participants were asked if they were in receipt of any benefit payments. Individuals reporting receipt of Incapacity Benefit (IB) or Severe Disablement Allowance were identified as being on long term sick leave. Typically these participants were off work for health reasons for more than 6 months. Data on benefit receipt were not available for the 1946 birth cohort in 1999. Instead participants were asked (yes/no) if they were in a job. Those who responded ‘No’ were asked (yes/no) if they were looking for work. Those who also replied ‘No’ to this question were asked why and asked to select a response from 6 options, one of which was “Permanently sick or disabled”. Individuals reporting this option as the reason they were not looking for work were identified as being



1  
2  
3 on long term sick leave. We have previously described research using this category in the Aberdeen  
4 Children of the Nineteen Fifties cohort <sup>15</sup>.

5  
6  
7 *Exposures of interest*

8  
9  
10 The 1946 and 1958 cohorts contain data on participants' cognitive ability at age 11; the 1970 cohort  
11 has a measure at age 10. 1946 cohort members were tested at age 11 on verbal and non-verbal  
12 intelligence, arithmetic, word pronunciation, and vocabulary. Scores were summed to represent  
13 overall cognitive ability. The cognitive ability of the 1958 cohort members was assessed using the  
14 General Ability Test <sup>24</sup>. 1970 cohort members completed a modified version of the British Ability  
15 Scales (BAS) <sup>25</sup>. A principal components analysis was performed on the four subscales of the BAS  
16 and the first factor was taken as a general measure of cognitive ability <sup>26</sup>. For all cohorts cognitive  
17 ability scores were divided into quartiles and the first (lowest cognitive ability) used as the reference  
18 group.  
19  
20  
21  
22  
23  
24  
25  
26  
27

28  
29 In all three cohorts occupation of the father at the time of the participants' birth was coded according  
30 to the Registrar General's classification. For these analyses social class was categorised as Class I/II,  
31 Class III (non-manual and manual) and Class IV/V. Participants were asked about their current or  
32 most recent job, and these were similarly coded. Common mental disorders are the most common  
33 reason for sick leave<sup>9</sup>. All cohorts contained a measure of depression or psychological distress. 1946  
34 cohort members were administered the Present state Examination <sup>27</sup> at age 36 years, and depression in  
35 the preceding year was derived from the CATEGO algorithm <sup>27</sup>. 1958 cohort members were  
36 administered the Malaise Inventory <sup>28</sup> in 1991. Those scoring 8/24 or more were identified as 'cases'  
37 of depression <sup>29</sup>. 1970 cohort members were administered the 12-item General Health Questionnaire <sup>30</sup>  
38 in 2000. Participants scoring 4 or more were identified as cases of psychological distress/depression  
39  
40  
41  
42  
43  
44  
45  
46  
47  
48  
49  
50  
51  
52  
53  
54  
55  
56  
57  
58  
59  
60

51  
52 The highest level of educational qualification was available in the 1946, 1958 and 1970 cohorts at  
53 ages 26, 33 and 26 years, respectively. All 3 cohorts categorised this information differently and thus  
54

1  
2  
3 all data were re-coded into degree; A level or equivalent; O level or equivalent; CSE grade 2-5; no  
4  
5 qualifications.

#### 6 7 *Risk set*

8  
9  
10 At any time-point the workless population is a heterogeneous one, comprising individuals on short-  
11  
12 term sick leave, individuals on long-term sick leave and some individuals who, for whatever reason,  
13  
14 have never worked. Many of this latter group will have substantial health difficulties such as severe  
15  
16 physical disabilities or learning disabilities. Our outcome was long term sick leave, and therefore in  
17  
18 all 3 cohorts analyses were restricted to those participants who described themselves as either in  
19  
20 employment or full-time education, or caring for a family in the sweep immediately prior to that from  
21  
22 which the outcome was derived.

#### 23 24 *Statistical Analyses*

25  
26  
27 All data were analysed using STATA version 9.2<sup>32</sup>. As with all longitudinal studies, partial data  
28  
29 collection and loss to follow-up meant that there were incomplete data on participants in all 3 cohorts.  
30  
31 To minimise the impact of missing data multiple imputation using chained equations (ICE)<sup>33</sup> was  
32  
33 carried out<sup>32</sup>. All variables were included in the imputation model<sup>34</sup>. 10 iterations were completed.  
34  
35 The MICOMBINE function was used to calculate average regression estimates across the 10 imputed  
36  
37 datasets.

38  
39  
40 For each cohort the prevalence of each of the exposures of interest was calculated. The unadjusted  
41  
42 association between childhood cognitive ability and long term sickness absence was estimated and  
43  
44 shown as odds ratios (OR), with 95% confidence intervals, for each of the four quartiles of childhood  
45  
46 cognition compared to the reference, and for the overall trend. These were then adjusted for the  
47  
48 potential confounders of sex and social class at birth. Finally, to examine the potential mediating  
49  
50 effects of covariables measured in adult life, adult social class, educational attainment and history of  
51  
52 recent depression or psychological distress were each added to the model.

#### 53 54 55 RESULTS

1  
2  
3 In 1999 2894 members of the 1946 cohort were eligible for this study, of whom 159 (5.5%) reported  
4 themselves as permanently sick or disabled. In 2000 there were 15 053 eligible members of the 1958  
5 cohort, of whom 431(2.9%) were in receipt of long term sickness benefits. In 2004 there were 14 713  
6 eligible members of the 1970 cohort, of whom 153 (1.04%) were in receipt of long term sickness  
7 benefits. The distribution of the covariables in each of the birth cohorts is shown in table 1.  
8  
9

10  
11 [Table 1 about here].  
12

13  
14  
15 The associations between childhood cognitive ability and long term sickness absence, adjusted for the  
16 covariables are shown in Table 2. This shows that for each cohort there is a strong impact of cognitive  
17 ability measured in childhood on the outcome several decades later. The top quartile showed between  
18 one quart and one half the odds of long term sickness absence depending upon the cohort studied. The  
19 effect was present after adjusting for sex and paternal social class (model 2). When potential  
20 mediating variables were added, effects were reduced. Adding social class in adulthood diminished  
21 effect sizes, particularly in the 1946 birth cohort. The overall impact of cognition on the outcome was  
22 statistically significant in two of the three cohorts. Adjusting for educational attainment also led to a  
23 reduction in effect sizes, with one cohort (the 1958) showing a significant trend of cognition on the  
24 outcome, whereas the others showed a marginally statistically significant effect, although the ORs for  
25 the lowest quartile were still of the order of two. Adjusting for prior mental disorder had little impact,  
26 with all three of the cohorts showing an independent effect of cognition on long term sickness  
27 absence. Finally, a full model controlling for all covariates simultaneously, showed a reduction in the  
28 effect of cognition on long term sickness, with one of the three cohorts (1958) remaining significant.  
29  
30  
31  
32  
33  
34  
35  
36  
37  
38  
39  
40  
41  
42  
43  
44

45 [Table 2 about here]  
46

## 47 DISCUSSION

### 48 *Summary of findings*

49  
50 We examined associations between cognitive ability measured in childhood and long term sickness  
51 absence in adult life across three British birth cohorts. In all three cohorts the effects after adjustment  
52 for sex and social class at birth were similar, and all three demonstrated a clear dose-response effect  
53  
54  
55  
56  
57  
58  
59  
60

1  
2  
3 whereby lower childhood cognitive ability was more strongly associated with long-term sick leave. In  
4 each cohort there was little attenuation when previous history of depression was included. There was  
5 some attenuation of the effect when adult social class and, particularly, educational attainment was  
6 included, and this attenuation was greater for those of lower cognitive ability. This suggests that some  
7 of the effect of lower cognitive ability is mediated by educational attainment. For example low  
8 educational attainment might lead to more insecure jobs or more manual jobs that could be more  
9 difficult to sustain in the context of disability. However educational attainment does not fully explain  
10 the association.  
11  
12

### 13 *Strengths and weaknesses*

14  
15 Strengths of this study include the use of data from three British cohorts across half a century, with  
16 outcome data from both early (age 34) and late career (age 53), thus these results seem to transcend  
17 period effects. These cohorts are broadly representative of the population born in UK in the years of  
18 their inception. Those relatively disadvantaged were more likely to be under-represented, but we  
19 have no reason to believe that this would have altered the pattern of results reported here. Exposures  
20 were measured long before the outcomes occurred, and cognitive ability was assessed using well  
21 recognised tools. Exposures in adult life were assessed independently of the research question,  
22 limiting the impact of reporting bias.  
23  
24

25  
26 Weaknesses include the different assessment tools used to measure childhood cognitive ability in each  
27 cohort which raises questions of comparability of results between cohorts. Paternal social class at  
28 birth was assessed by asking the participant's mother. There is likely to be a degree of  
29 misclassification here, most notable in the 1946 cohort as many fathers were just returning from the  
30 war. We believe any such misclassification is likely to be random. Although the associations between  
31 lower cognitive ability and long term sick leave remain after adjustment for parental social class we  
32 are mindful of the possibility of residual confounding from unmeasured variables acting in early life  
33 which might influence both childhood cognitive ability and adult ill-health. Depression or  
34 psychological distress was measured using different self-report tools in all three cohorts. Only recent  
35  
36  
37  
38  
39  
40  
41  
42  
43  
44  
45  
46  
47  
48  
49  
50  
51  
52  
53  
54  
55  
56  
57  
58  
59  
60

1  
2  
3 difficulties were asked for and as with all cohort studies the data are silent as to what happens  
4 between 'sweeps'. A more robust measure of depression which identified episodes of illness between  
5 sweeps would have been preferable.  
6  
7

8  
9 There is no accepted definition of long term sick leave. Although available in the 1958 and 1970  
10 cohorts, receipt of Incapacity Benefit was not available in the 1946 cohort and this is a limitation.  
11  
12 Nonetheless we believe the population captured under the heading "permanently sick or disabled" at  
13 age 53 to be very similar to those indentified as being in receipt of IB. Most IB recipients have been  
14 away from work for over 6 months. There are other routes in to incapacity benefit but the median time  
15 spent on IB is 5 years and the advantages of using this outweigh any limitations. The population we  
16 have studied represents the persistent and severe long term absentees. IB receipt is a binary question,  
17 asked relatively context free and this will minimise any recall, reporting or observer bias, and any  
18 misclassification is likely to be random. Furthermore we believe our findings have greater salience for  
19 policy makers as notwithstanding the introduction of Employment and Support Allowance they can be  
20 mapped straight onto the existing UK benefits framework.  
21  
22

23  
24 The effect sizes we have demonstrated are noticeably similar between the cohorts despite the  
25 differences in the cohorts and the methods used to assess cognitive ability. The impact of cognitive  
26 ability on later long term sickness absence attained conventional statistical significance in all three  
27 cohorts though most strongly for the 1958 cohort. The higher P value in the 1946 cohorts reflects the  
28 smaller size of the cohort (less than half that of the other two). In the 1970 cohort the outcome was  
29 rare (1%) and hence statistical power was greatest in the 1958 cohort. Our results cannot be accounted  
30 for by the people with very low cognitive ability never entering the labour force as we restricted our  
31 analyses to only those were either working or fulfilling other social roles (caring for a family or  
32 studying) at the previous sweep.  
33  
34

35  
36 There are no data on the cognitive abilities of people claiming Incapacity Benefit. Our study shows  
37 that the bottom two quartiles of cognitive ability are responsible for a considerable proportion of the  
38 IB recipient population. We present regression models showing the impact of controlling for a  
39  
40  
41  
42  
43  
44  
45  
46  
47  
48  
49  
50  
51  
52  
53  
54  
55  
56  
57  
58  
59  
60

1  
2  
3 number of variables on these associations. It is worth noting that we do not consider these factors  
4  
5 predominantly as confounders – in other words, although the association between cognition is  
6  
7 attenuated and becomes non-significant in two of the three cohorts when educational attainment, adult  
8  
9 social class, and depression are controlled, this does not indicate that the univariate association  
10  
11 between cognition and long term sickness absence is merely a result of confounding. Rather, we  
12  
13 consider it probable that these variables are mediators of the association. Thus the association  
14  
15 between lower cognitive status and long term sickness absence is in part explained by a pathway via  
16  
17 educational attainment and adult social class.

18  
19 There is an extensive literature on the health implications of low cognitive ability<sup>35-37</sup>. However we  
20  
21 think it unlikely that the association we gave described between low cognitive ability in childhood and  
22  
23 adult occupational outcomes is simply because these individuals are more likely to become unwell.

24  
25 First, we have deliberately not attempted to ascertain the clinical labels as to why an individual is in  
26  
27 receipt of IB – the effect of cognitive ability is substantial enough to be observed at cohort level.

28  
29 Second, the very limited attenuating effect of depression in all three cohorts suggests that the  
30  
31 mechanism behind this association is largely independent of mental health, the most common reason  
32  
33 for long term sick leave. This is also suggested by the consistency of results across the three cohorts  
34  
35 as the health difficulties suffered by those in their thirties are likely to be different to those suffered by  
36  
37 people in their fifties. Last, whilst previous work on the 1946 cohort<sup>38</sup>, replicating work on the 1958  
38  
39 and 1970 cohorts<sup>26 39-41</sup>, has shown an association between cognitive ability and adult chronic physical  
40  
41 diseases, these associations were mediated by education and to a lesser degree socioeconomic status,  
42  
43 both of which are included in our analyses.

44  
45  
46 In trying to understand how childhood cognitive function affects adult occupational function it is  
47  
48 important to recognise that long term sick leave is the result of a process rather than an event<sup>10</sup>. These  
49  
50 data are unable to tell us if lower cognitive ability makes it more likely that an individual with a  
51  
52 particular disorder or set of symptoms is more likely to go off work sick, or less able to get  
53  
54 appropriate support when they are ill, or find it more difficult to negotiate a successful return to work  
55  
56 after a period of ill health. Cognitive ability might impact on any or all of these, possibly in “soft”  
57  
58

1  
2  
3 ways such as by directing responses to illness or by facilitating the recruitment of support from health  
4 professionals, line managers, colleagues and friends. Such a model has previously been proposed for  
5 the association between IQ and mortality<sup>42</sup>. The important role of education, identified in all three  
6 cohorts, is consistent with this idea. Low cognitive ability and/or low educational attainment are likely  
7 to be associated with a limited ability to transfer skills. So, for example, if an individual with few  
8 skills goes off sick from a labouring job, the options with regard to alternative employment are few.  
9 The change in last 40 years from a manufacturing economy to a service-based economy makes such a  
10 lack of flexibility all the more problematic.

11  
12 Our findings suggest that health is only one factor in understanding long term sickness absence. We  
13 suggest that education should form part of the policy response to long term sickness absence: for  
14 future generations equipping children with skills necessary for labour market flexibility may inoculate  
15 them from the risk of long term sickness absence. For the present cohorts of individuals on incapacity  
16 benefits it is important to recognise that their cognitive abilities may be below average and that the  
17 most fruitful approach to rehabilitation may be to improve skills. More broadly the devastating  
18 outcome of long term worklessness for those with health problems needs to be seen as having its roots  
19 as much in a combination of individual risk factors as in the health and workplace factors which have  
20 been the basis for much of the policy response to date.

Table 1 Distribution of covariables in 3 British birth cohorts

|                                       |                                | 1946 cohort  |                      | 1958 cohort  |                      | 1970 cohort  |                      |
|---------------------------------------|--------------------------------|--------------|----------------------|--------------|----------------------|--------------|----------------------|
|                                       |                                | Whole cohort | Long term sick leave | Whole cohort | Long term sick leave | Whole cohort | Long term sick leave |
| <b>Sex</b>                            | <b>Male</b>                    | 1561 (54%)   | 72 (45%)             | 7483 (50%)   | 190 (44%)            | 7373 (50%)   | 62 (41%)             |
|                                       | <b>Female</b>                  | 1333 (46%)   | 89 (55%)             | 7570 (50%)   | 241 (55%)            | 7340 (50%)   | 91 (59%)             |
| <b>Social class at birth</b>          | <b>I/II</b>                    | 656 (23%)    | 18 (11%)             | 2611 (17%)   | 37 (8%)              | 2431 (17%)   | 20 (13%)             |
|                                       | <b>III</b>                     | 1505 (52%)   | 76 (47%)             | 8849 (59%)   | 274 (64%)            | 10359 (70%)  | 80 (52%)             |
|                                       | <b>IV/V</b>                    | 733 (25%)    | 67 (42%)             | 3593 (24%)   | 120 (28%)            | 1923 (13%)   | 53 (35%)             |
| <b>Educational attainment</b>         | <b>Degree</b>                  | 30 (1%)      | 1 (0.5%)             | 1867 (12%)   | 21 (5%)              | 2708 (18%)   | 16 (10%)             |
|                                       | <b>A levels</b>                | 270 (9%)     | 3 (2%)               | 1962 (13%)   | 86 (20%)             | 2054 (14%)   | 14 (9%)              |
|                                       | <b>O Levels</b>                | 740 (26%)    | 17 (10.5%)           | 5200 (35%)   | 143 (33%)            | 6178 (42%)   | 77 (50%)             |
|                                       | <b>CSEs</b>                    | 575 (20%)    | 25 (16%)             | 4204 (28%)   | 79 (18%)             | 2904 (20%)   | 34 (22%)             |
|                                       | <b>No qualifications</b>       | 1279 (44%)   | 115 (71%)            | 1820 (12%)   | 103 (24%)            | 869 (6%)     | 12 (8%)              |
| <b>Social class at last sweep</b>     | <b>I/II</b>                    | 1284 (45%)   | 40 (25%)             | 2675 (18%)   | 55 (13%)             | 6037 (41%)   | 47 (31%)             |
|                                       | <b>III</b>                     | 1138 (39%)   | 60 (37%)             | 7779 (52%)   | 220 (51%)            | 6159 (42%)   | 64 (42%)             |
|                                       | <b>IV/V</b>                    | 472 (16%)    | 61 (38%)             | 4599 (30%)   | 156 (36%)            | 2517 (17%)   | 42 (27%)             |
| <b>Previous depression</b>            | <b>Yes</b>                     | 502 (17%)    | 37 (23%)             | 946 (6%)     | 73 (17%)             | 3387 (23%)   | 36 (24%)             |
|                                       | <b>No</b>                      | 2392 (83%)   | 124 (77%)            | 14107 (94%)  | 358 (83%)            | 11326 (77%)  | 117 (76%)            |
| <b>Cognitive ability in childhood</b> | <b>Quartile 1 (least able)</b> | 657 (23%)    | 76 (47%)             | 3768 (25%)   | 175 (41%)            | 3663 (25%)   | 49 (32%)             |
|                                       | <b>Quartile 2</b>              | 707 (24%)    | 37 (23%)             | 3776 (25%)   | 125 (29%)            | 3758 (26%)   | 47 (31%)             |
|                                       | <b>Quartile 3</b>              | 757 (26%)    | 28 (17%)             | 3907 (26%)   | 77 (18%)             | 3722 (25%)   | 35 (23%)             |
|                                       | <b>Quartile 4 (most able)</b>  | 773 (27%)    | 20 (13%)             | 3602 (24%)   | 54 (12%)             | 3570 (24%)   | 22 (14%)             |



Table 2. The association between childhood cognitive ability and long term sickness absence in 3 British birth cohorts

|             |                         | Model 1: Unadjusted |         | Model 2: Adjusted for sex, paternal social class |         | Model 2 + adult social class |         | Model 2 + educational attainment |         | Model 2 + depression |         | Adjusted for all covariables |         |
|-------------|-------------------------|---------------------|---------|--------------------------------------------------|---------|------------------------------|---------|----------------------------------|---------|----------------------|---------|------------------------------|---------|
|             |                         | OR (95% CI)         | p       | OR (95% CI)                                      | p       | OR (95% CI)                  | P       | OR (95% CI)                      | p       | OR (95% CI)          | P       | OR (95% CI)                  | p       |
| 1946 cohort | Cognition               | 0.66 (0.53,0.82)    | P<0.001 | 0.70 (0.56,0.86)                                 | P=0.001 | 0.78 (0.63,0.98)             | P=0.04  | 0.80 (0.63,1.02)                 | P=0.07  | 0.69 (0.56,0.86)     | P=0.001 | 0.84                         | P=0.15  |
|             | Quartile 1 (least able) | 1                   |         | 1                                                |         | 1                            |         | 1                                |         | 1                    |         | 1                            |         |
|             | Quartile 2              | 0.77 (0.46,1.29)    | P=0.32  | 0.84 (0.50,1.42)                                 | P=0.52  | 0.98 (0.57,1.67)             | P=0.93  | 0.95 (0.56,1.61)                 | P=0.84  | 0.84 (0.50,1.41)     | P=0.51  | 1.02 (0.60,1.74)             | P=0.94  |
|             | Quartile 3              | 0.49 (0.27,0.88)    | P=0.02  | 0.54 (0.30,0.96)                                 | P=0.04  | 0.65 (0.36,1.19)             | P=0.17  | 0.67 (0.36,1.24)                 | P=0.21  | 0.52 (0.29,0.95)     | P=0.03  | 0.71 (0.38,1.33)             | P=0.29  |
|             | Quartile 4 (most able)  | 0.26 (0.11,0.58)    | P=0.001 | 0.31 (0.13,0.70)                                 | P=0.005 | 0.44 (0.18,1.05)             | P=0.06  | 0.45 (0.18,1.11)                 | P=0.09  | 0.30 (0.13,0.69)     | P=0.005 | 0.53 (0.21,1.33)             | P=0.17  |
|             |                         |                     |         |                                                  |         |                              |         |                                  |         |                      |         |                              |         |
| 1958 cohort | Cognition               | 0.68 (0.60,0.76)    | P<0.001 | 0.69 (0.61,0.77)                                 | P<0.001 | 0.69 (0.61,0.78)             | P<0.001 | 0.77 (0.67,0.90)                 | P=0.001 | 0.72 (0.64,0.81)     | P<0.001 | 0.79 (0.68,0.92)             | P=0.002 |
|             | Quartile 1 (least able) | 1                   |         | 1                                                |         | 1                            |         | 1                                |         | 1                    |         | 1                            |         |
|             | Quartile 2              | 0.67 (0.51,0.88)    | P=0.004 | 0.68 (0.52,0.89)                                 | P=0.005 | 0.68 (0.52,0.90)             | P=0.006 | 0.78 (0.59,1.03)                 | P=0.09  | 0.72 (0.54,0.94)     | P=0.02  | 0.81 (0.61,1.07)             | P=0.13  |
|             | Quartile 3              | 0.43 (0.31,0.59)    | P<0.001 | 0.44 (0.32, 0.61)                                | P<0.001 | 0.45 (0.33,0.62)             | P<0.001 | 0.56 (0.40,0.79)                 | P=0.001 | 0.49 (0.35,0.68)     | P<0.001 | 0.60 (0.42,0.84)             | P=0.003 |
|             | Quartile 4 (most able)  | 0.32 (0.22,0.48)    | P<0.001 | 0.35 (0.24,0.52)                                 | P<0.001 | 0.36 (0.24,0.54)             | P<0.001 | 0.49 (0.30,0.81)                 | P=0.005 | 0.39 (0.26,0.59)     | P<0.001 | 0.53 (0.32,0.86)             | P=0.01  |
|             |                         |                     |         |                                                  |         |                              |         |                                  |         |                      |         |                              |         |
| 1970 cohort | Cognition               | 0.78 (0.64,0.94)    | P=0.01  | 0.80 (0.66,0.97)                                 | P=0.03  | 0.84 (0.69,1.03)             | P=0.1   | 0.85 (0.70,1.02)                 | P=0.08  | 0.80 (0.66,0.98)     | P=0.03  | 0.87 (0.72,1.05)             | P=0.15  |
|             | Quartile 1 (least able) | 1                   |         | 1                                                |         | 1                            |         | 1                                |         | 1                    |         | 1                            |         |
|             | Quartile 2              | 0.94 (0.48,1.82)    | P=0.85  | 0.97 (0.50,1.88)                                 | P=0.93  | 1.03 (0.52,2.03)             | P=0.93  | 1.0 (0.51,1.94)                  | P=0.99  | 0.97 (0.50,1.87)     | P=0.92  | 1.03 (0.52,2.02)             | P=0.93  |
|             | Quartile 3              | 0.71 (0.44,1.15)    | P=0.17  | 0.74 (0.46,1.21)                                 | P=0.24  | 0.82 (0.50,1.34)             | P=0.43  | 0.80 (0.50,1.29)                 | P=0.37  | 0.75 (0.46,1.22)     | P=0.24  | 0.82 (0.50,1.34)             | P=0.43  |
|             | Quartile 4 (most able)  | 0.44 (0.21,0.90)    | P=0.03  | 0.48 (0.24,0.98)                                 | P=0.04  | 0.56 (0.26,1.19)             | 0.13    | 0.57 (0.28,1.12)                 | P=0.10  | 0.48 (0.24,0.98)     | P=0.04  | 0.56 (0.26,1.19)             | P=0.13  |

## References

1. O.N.S. Labour Market Statistics - June 2011. London 2011.
2. Black C. Working for a healthier tomorrow. London: The Stationery Office 2008.
3. DWP. The Coalition: Our Programme for Government - Jobs and Welfare. London 2010.
4. Frost D, Black C. Health at Work - an independent review of sickness absence. London: Department for Work and Pensions 2011.
5. Head J, Ferrie JE, Alexanderson K, et al. Diagnosis-specific sickness absence as a predictor of mortality: the Whitehall II prospective cohort study. *BMJ* 2008;**337**:a1469.
6. Gjesdal S, Ringdal PR, Haug K, et al. Mortality after long-term sickness absence: prospective cohort study. *Eur J Public Health* 2008;**18**:517-21.
7. Vahtera J, Pentti J, Kivimaki M. Sickness absence as a predictor of mortality among male and female employees. *J Epidemiol Community Health* 2004;**58**:321-6.
8. Department for Work and Pensions. A new deal for welfare: Empowering people to work. London: DWP 2006.
9. Cattrell A, Harris EC, Palmer KT, et al. Regional trends in awards of incapacity benefit by cause. *Occupational medicine* 2011;**61**:148-51.
10. Henderson M, Harvey S, Overland S, et al. Work and common psychiatric disorders. *J R Soc Med* 2011;**104**:198-207.
11. Palmer KT, Walsh K, Bendall H, et al. Back pain in Britain: comparison of two prevalence surveys at an interval of 10 years. *BMJ* 2000;**320**:1577-8.
12. H.S.E. Statistics 2009/10. London: Health & Safety Executive 2010.
13. Office for National Statistics. Labour Force Survey. London: O.N.S., 2010.

14. Harvey S, Henderson M. Occupational Psychiatry. *Psychiatry* 2009;**8**:174-78.
15. Henderson M, Hotopf M, Leon D. Childhood temperament and long term sickness absence in adult life. *Br J Psychiatry* 2009;**194**:220-23.
16. Upmark M, Lundberg I, Sadigh J, et al. Conditions during childhood and adolescence as explanations of social class differences in disability pension among young men. *Scand J Public Health* 2001;**29**:96-103.
17. Gravseth HM, Bjerkedal T, Irgens LM, et al. Life course determinants for early disability pension: a follow-up of Norwegian men and women born 1967-1976. *Eur J Epidemiol* 2007;**22**:533-43.
18. Gravseth HM, Bjerkedal T, Irgens LM, et al. Influence of physical, mental and intellectual development on disability in young Norwegian men. *Eur J Public Health* 2008;**18**:650-5.
19. Ferri J, Bynner J, Wadsworth M,(eds.) *Changing Britain, Changing Lives - Three generations at the turn of the century*. London: Institute of Education, 2003.
20. Wadsworth M, Kuh D, Richards M, et al. Cohort Profile: The 1946 National Birth Cohort (MRC National Survey of Health and Development). *Int J Epidemiol* 2006;**35**:49-54.
21. Wadsworth ME, Butterworth SL, Hardy RJ, et al. The life course prospective design: an example of benefits and problems associated with study longevity. *Soc Sci Med* 2003;**57**:2193-205.
22. Power C, Elliott J. Cohort profile: 1958 British birth cohort (National Child Development Study). *Int J Epidemiol* 2006;**35**:34-41.
23. Elliott J, Shepherd P. Cohort profile: 1970 British Birth Cohort (BCS70). *Int J Epidemiol* 2006;**35**:836-43.
24. Douglas JWB. *The Home and the School*. London: McGibbon and Kee, 1964.

- 1  
2  
3 25. Elliott C, Murray D, Pearson L. *British Ability Scales*. Windsor: National Foundation for  
4  
5 Educational Research, 1978.  
6  
7 26. Batty GD, Deary IJ, Schoon I, et al. Childhood mental ability in relation to cause-specific  
8  
9 accidents in adulthood: the 1970 British Cohort Study. *QJM* 2007;**100**:405-14.  
10  
11 27. Wing JK, Cooper JE, Sartorius N. *Measurement and classification of psychiatric*  
12  
13 *symptoms; an instruction manual for the PSE and Catego Program*. London:  
14  
15 Cambridge University Press, 1974.  
16  
17 28. Rutter M, Tizard J, Whitmore K. *Education, Health and Behaviour*. London: Longmans,  
18  
19 1970.  
20  
21 29. Cheung SY, Buchanan A. Malaise scores in adulthood of children and young people who  
22  
23 have been in care. *Journal of child psychology and psychiatry, and allied disciplines*  
24  
25 1997;**38**:575-80.  
26  
27 30. Goldberg D, Williams P. *A User's Guide to the General Health Questionnaire*. Windsor:  
28  
29 Nfer-Nelson, 1988.  
30  
31 31. Sproston K, Primatesta P. Health Survey for England 2003. London, 2004.  
32  
33 32. StataCorp. *Stata Statistical Software*. College Station, TX:Stata Corporation: Release 9.1,  
34  
35 2005.  
36  
37 33. Royston P. Multiple imputation of missing values. *Stata Journal* 2004;4(3):227-41.  
38  
39 34. Sterne JA, White IR, Carlin JB, et al. Multiple imputation for missing data in  
40  
41 epidemiological and clinical research: potential and pitfalls. *BMJ* 2009;338:b2393.  
42  
43 35. Batty GD, Deary IJ, Macintyre S. Childhood IQ in relation to risk factors for premature  
44  
45 mortality in middle-aged persons: the Aberdeen Children of the 1950s study. *J*  
46  
47 *Epidemiol Community Health* 2007;**61**:241-7.  
48  
49  
50  
51  
52  
53  
54  
55  
56  
57  
58  
59  
60

- 1  
2  
3 36. Der G, Batty GD, Deary IJ. The association between IQ in adolescence and a range of  
4 health outcomes at 40 in the 1979 US National Longitudinal Study of Youth.  
5  
6  
7 *Intelligence* 2009;**37**:573-80.  
8  
9  
10 37. Kuh D, Richards M, Hardy R, et al. Childhood cognitive ability and deaths up until  
11 middle age: a post-war birth cohort study. *Int J Epidemiol* 2004;**33**:408-13.  
12  
13  
14 38. Richards M, Stephen AM, Mishra G. Health returns to cognitive capital in the British  
15 1946 birth cohort. *Longitudinal and lifecourse studies* 2010;**1**:281-96.  
16  
17  
18 39. Chandola T, Deary IJ, Blane D, et al. Childhood IQ in relation to obesity and weight gain  
19 in adult life: the National Child Development (1958) Study. *International Journal of*  
20 *Obesity* 2006;**30**:1422-32.  
21  
22  
23  
24 40. Gale CR, Johnson W, Deary IJ, et al. Intelligence in girls and their subsequent smoking  
25 behaviour as mothers: the 1958 National Child Development Study and the 1970  
26 British Cohort Study. *Int J Epidemiol* 2009;**38**:173-81.  
27  
28  
29  
30 41. Power C, Jefferis BJ, Manor O. Childhood cognition and risk factors for cardiovascular  
31 disease in midadulthood: the 1958 British Birth Cohort Study. *Am J Public*  
32 *Health*;**100**:129-36.  
33  
34  
35  
36  
37  
38 42. Gottfredson LS, Deary IJ. Intelligence predicts health and longevity, but why? *Current*  
39 *Directions in Psychological Science* 2004;**13**:1-4.  
40  
41  
42  
43  
44  
45  
46  
47  
48  
49  
50  
51  
52  
53  
54  
55  
56  
57  
58  
59  
60

## WHAT IS ALREADY KNOWN ON THIS SUBJECT

- Mental ill health and musculoskeletal disorders are the most common diagnoses in people on long term sick leave.
- However, the associations between objective measures of health and long term sick leave are weak
- Most research has focussed on occupational risk factors for sickness absence, such as the psychosocial work environment.
- Relatively little research has examined the role of individual risk factors

## WHAT THIS STUDY ADDS

- There is a clear dose-response relationship between lower cognitive function in childhood and increased odds of being on long term sick leave in adulthood.
- This association applies to younger as well as older workers, and holds true irrespective of the decade of birth.
- This association is mediated in part by education attainment suggesting improved education, especially for those with lower cognitive abilities, may help inoculate them from the risk of long term sickness absence.

## COPYRIGHT

“The Corresponding Author has the right to grant on behalf of all authors and does grant on behalf of all authors, a worldwide licence to the Publishers and its licensees in perpetuity, in all forms, formats and media (whether known now or created in the future), to i) publish, reproduce, distribute, display and store the Contribution, ii) translate the Contribution into other languages, create adaptations, reprints, include within collections and create summaries, extracts and/or, abstracts of the Contribution, iii) create any other derivative work(s) based on the Contribution, iv) to exploit all subsidiary rights in the Contribution, v) the inclusion of electronic links from the Contribution to third party material where-ever it may be located; and, vi) licence any third party to do any or all of the above.”

## COMPETING INTERESTS

"All authors have completed the Unified Competing Interest form at [www.icmje.org/coi\\_disclosure.pdf](http://www.icmje.org/coi_disclosure.pdf) (available on request from the corresponding author) and declare: no support from any organisation for the submitted work; no financial relationships with any organisations that might have an interest in the submitted work in the previous 3 years; no other relationships or activities that could appear to have influenced the submitted work."

## CONTRIBUTORS

Henderson, Hotopf and Stansfeld conceived the study. Henderson Hotopf and Richards analysed the data. Henderson Hotopf Stansfeld and Richards interpreted the results. Henderson drafted the manuscript. Hotopf Stansfeld and Richards critically revised the manuscript for important intellectual content.

All authors approved the final version.

Henderson is the guarantor.

1  
2  
3 ETHICAL APPROVAL  
4  
5

6 Not required for this study.  
7  
8  
9

10  
11 ACKNOWLEDGEMENTS  
12

13 We are grateful to all the participants of each cohort study. We acknowledge the support of Imran  
14 Shah at the National Survey of Health and Development in providing us with data.  
15  
16  
17  
18  
19

20  
21 FUNDING  
22

23  
24 Dr Henderson received support from a Medical Research Council Research Training Fellowship in  
25 Health Services and Health of the Public Research. He is now supported by the NIHR Biomedical  
26 Research Centre BRC Nucleus jointly funded by the Guys and St Thomas' Charity and the South  
27 London and Maudsley Trustees. Professor Hotopf is supported by the NIHR Biomedical Research  
28 Centre for Mental Health at the South London and Maudsley NHS Foundation Trust and Institute of  
29 Psychiatry, Kings College London.  
30  
31  
32  
33  
34  
35

36  
37 All authors confirm that this research was carried out independent of the funders.  
38  
39  
40  
41  
42  
43  
44  
45  
46  
47  
48  
49  
50  
51  
52  
53  
54  
55  
56  
57  
58  
59  
60



RESEARCH CHECKLIST: The association between childhood cognitive ability and long term sickness absence in 3 British birth cohorts

|                           | Item No | Recommendation                                                                                                                                                                                                                                                          | Page no. in paper |
|---------------------------|---------|-------------------------------------------------------------------------------------------------------------------------------------------------------------------------------------------------------------------------------------------------------------------------|-------------------|
| <b>Title and abstract</b> | 1       | (a) Indicate the study's design with a commonly used term in the title or the abstract                                                                                                                                                                                  | 1                 |
|                           |         | (b) Provide in the abstract an informative and balanced summary of what was done and what was found                                                                                                                                                                     | 2                 |
| <b>Introduction</b>       |         |                                                                                                                                                                                                                                                                         |                   |
| Background/rationale      | 2       | Explain the scientific background and rationale for the investigation being reported                                                                                                                                                                                    | 3-4               |
| Objectives                | 3       | State specific objectives, including any prespecified hypotheses                                                                                                                                                                                                        | 4                 |
| <b>Methods</b>            |         |                                                                                                                                                                                                                                                                         |                   |
| Study design              | 4       | Present key elements of study design early in the paper                                                                                                                                                                                                                 | 4                 |
| Setting                   | 5       | Describe the setting, locations, and relevant dates, including periods of recruitment, exposure, follow-up, and data collection                                                                                                                                         | 4-7               |
| Participants              | 6       | (a) Give the eligibility criteria, and the sources and methods of selection of participants. Describe methods of follow-up<br><br><i>Author note: Our study used data from 3 British birth cohorts, all of which have been extensively investigated and reported on</i> | 4-5               |
|                           |         | (b) For matched studies, give matching criteria and number of exposed and unexposed                                                                                                                                                                                     | NA                |
| Variables                 | 7       | Clearly define all outcomes, exposures, predictors, potential confounders, and effect modifiers. Give diagnostic criteria, if applicable                                                                                                                                |                   |
| Data sources/measurement  | 8*      | For each variable of interest, give sources of data and details of methods of assessment (measurement). Describe comparability of assessment methods if there is more than one group                                                                                    | 5-7               |
| Bias                      | 9       | Describe any efforts to address potential sources of bias                                                                                                                                                                                                               | 9-10              |
| Study size                | 10      | Explain how the study size was arrived at<br><br><i>Author note: we used data from 3 well established birth cohorts and have cited detailed descriptions of each</i>                                                                                                    |                   |
|                           |         |                                                                                                                                                                                                                                                                         |                   |
| Quantitative variables    | 11      | Explain how quantitative variables were handled in the analyses. If applicable, describe which groupings were chosen and why                                                                                                                                            | 6-7               |
| Statistical methods       | 12      | (a) Describe all statistical methods, including those used to control for confounding                                                                                                                                                                                   | 7                 |
|                           |         | (b) Describe any methods used to examine subgroups and interactions                                                                                                                                                                                                     | n/a               |
|                           |         | (c) Explain how missing data were addressed                                                                                                                                                                                                                             | 7                 |
|                           |         | (d) If applicable, explain how loss to follow-up was addressed                                                                                                                                                                                                          | 7                 |
|                           |         | (e) Describe any sensitivity analyses                                                                                                                                                                                                                                   | None              |

| <b>Results</b>           |     |                                                                                                                                                                                                                                                                                                                                                                                                                                                                                                                                                                                               |                    |
|--------------------------|-----|-----------------------------------------------------------------------------------------------------------------------------------------------------------------------------------------------------------------------------------------------------------------------------------------------------------------------------------------------------------------------------------------------------------------------------------------------------------------------------------------------------------------------------------------------------------------------------------------------|--------------------|
| Participants             | 13* | (a) Report numbers of individuals at each stage of study—eg numbers potentially eligible, examined for eligibility, confirmed eligible, included in the study, completing follow-up, and analysed<br><br>(b) Give reasons for non-participation at each stage<br><br>(c) Consider use of a flow diagram<br><br><i>Author note: we cite “About the cohort” papers for all 3 cohorts in addition to Professor Wadsworth’s book which provides further information. We would happily include further information in the paper if required but with 3 birth cohorts we felt this was too much</i> | 8                  |
| Descriptive data         | 14* | (a) Give characteristics of study participants (eg demographic, clinical, social) and information on exposures and potential confounders<br><br>(b) Indicate number of participants with missing data for each variable of interest<br><br>(c) Summarise follow-up time (eg, average and total amount)                                                                                                                                                                                                                                                                                        | 13<br><br><br>n/a  |
| Outcome data             | 15* | Report numbers of outcome events or summary measures over time                                                                                                                                                                                                                                                                                                                                                                                                                                                                                                                                | 8                  |
| Main results             | 16  | (a) Give unadjusted estimates and, if applicable, confounder-adjusted estimates and their precision (eg, 95% confidence interval). Make clear which confounders were adjusted for and why they were included<br><br>(b) Report category boundaries when continuous variables were categorized<br><br>(c) If relevant, consider translating estimates of relative risk into absolute risk for a meaningful time period                                                                                                                                                                         | 13<br><br>NA<br>NA |
| Other analyses           | 17  | Report other analyses done—eg analyses of subgroups and interactions, and sensitivity analyses                                                                                                                                                                                                                                                                                                                                                                                                                                                                                                | None               |
| <b>Discussion</b>        |     |                                                                                                                                                                                                                                                                                                                                                                                                                                                                                                                                                                                               |                    |
| Key results              | 18  | Summarise key results with reference to study objectives                                                                                                                                                                                                                                                                                                                                                                                                                                                                                                                                      | 8-9                |
| Limitations              | 19  | Discuss limitations of the study, taking into account sources of potential bias or imprecision. Discuss both direction and magnitude of any potential bias                                                                                                                                                                                                                                                                                                                                                                                                                                    | 9-10               |
| Interpretation           | 20  | Give a cautious overall interpretation of results considering objectives, limitations, multiplicity of analyses, results from similar studies, and other relevant evidence                                                                                                                                                                                                                                                                                                                                                                                                                    | 11-12              |
| Generalisability         | 21  | Discuss the generalisability (external validity) of the study results                                                                                                                                                                                                                                                                                                                                                                                                                                                                                                                         | 11-12              |
| <b>Other information</b> |     |                                                                                                                                                                                                                                                                                                                                                                                                                                                                                                                                                                                               |                    |
| Funding                  | 22  | Give the source of funding and the role of the funders for the present study and, if applicable, for the original study on which the present article is based                                                                                                                                                                                                                                                                                                                                                                                                                                 | 19                 |

\*Give information separately for exposed and unexposed groups.

1 **Note:** An Explanation and Elaboration article discusses each checklist item and gives methodological background and  
2 published examples of transparent reporting. The STROBE checklist is best used in conjunction with this article (freely  
3 available on the Web sites of PLoS Medicine at <http://www.plosmedicine.org/>, Annals of Internal Medicine at  
4 <http://www.annals.org/>, and Epidemiology at <http://www.epidem.com/>). Information on the STROBE Initiative is  
5 available at <http://www.strobe-statement.org>.  
6  
7  
8  
9  
10  
11  
12  
13  
14  
15  
16  
17  
18  
19  
20  
21  
22  
23  
24  
25  
26  
27  
28  
29  
30  
31  
32  
33  
34  
35  
36  
37  
38  
39  
40  
41  
42  
43  
44  
45  
46  
47  
48  
49  
50  
51  
52  
53  
54  
55  
56  
57  
58  
59  
60

For peer review only

1 RESEARCH CHECKLIST: The association between childhood cognitive ability and long term sickness absence in 3  
 2 British birth cohorts  
 3

|                           | Item No | Recommendation                                                                                                                                                                                                                                                                                                                                                                                                                              | Page no. in paper |
|---------------------------|---------|---------------------------------------------------------------------------------------------------------------------------------------------------------------------------------------------------------------------------------------------------------------------------------------------------------------------------------------------------------------------------------------------------------------------------------------------|-------------------|
| <b>Title and abstract</b> | 1       | (a) Indicate the study's design with a commonly used term in the title or the abstract                                                                                                                                                                                                                                                                                                                                                      | 1                 |
|                           |         | (b) Provide in the abstract an informative and balanced summary of what was done and what was found                                                                                                                                                                                                                                                                                                                                         | 2                 |
| <b>Introduction</b>       |         |                                                                                                                                                                                                                                                                                                                                                                                                                                             |                   |
| Background/rationale      | 2       | Explain the scientific background and rationale for the investigation being reported                                                                                                                                                                                                                                                                                                                                                        | 3-4               |
| Objectives                | 3       | State specific objectives, including any prespecified hypotheses                                                                                                                                                                                                                                                                                                                                                                            | 4                 |
| <b>Methods</b>            |         |                                                                                                                                                                                                                                                                                                                                                                                                                                             |                   |
| Study design              | 4       | Present key elements of study design early in the paper                                                                                                                                                                                                                                                                                                                                                                                     | 4                 |
| Setting                   | 5       | Describe the setting, locations, and relevant dates, including periods of recruitment, exposure, follow-up, and data collection                                                                                                                                                                                                                                                                                                             | 4-7               |
| Participants              | 6       | (a) Give the eligibility criteria, and the sources and methods of selection of participants. Describe methods of follow-up<br><i>Author note: Our study used data from 3 British birth cohorts, all of which have been extensively investigated and reported on</i>                                                                                                                                                                         | 4-5               |
|                           |         | (b) For matched studies, give matching criteria and number of exposed and unexposed                                                                                                                                                                                                                                                                                                                                                         | NA                |
| Variables                 | 7       | Clearly define all outcomes, exposures, predictors, potential confounders, and effect modifiers. Give diagnostic criteria, if applicable                                                                                                                                                                                                                                                                                                    |                   |
| Data sources/measurement  | 8*      | For each variable of interest, give sources of data and details of methods of assessment (measurement). Describe comparability of assessment methods if there is more than one group                                                                                                                                                                                                                                                        | 5-7               |
| Bias                      | 9       | Describe any efforts to address potential sources of bias                                                                                                                                                                                                                                                                                                                                                                                   | 9-10              |
| Study size                | 10      | Explain how the study size was arrived at<br><i>Author note: we used data from 3 well established birth cohorts and have cited detailed descriptions of each</i>                                                                                                                                                                                                                                                                            |                   |
| Quantitative variables    | 11      | Explain how quantitative variables were handled in the analyses. If applicable, describe which groupings were chosen and why                                                                                                                                                                                                                                                                                                                | 6-7               |
| Statistical methods       | 12      | (a) Describe all statistical methods, including those used to control for confounding                                                                                                                                                                                                                                                                                                                                                       | 7                 |
|                           |         | (b) Describe any methods used to examine subgroups and interactions                                                                                                                                                                                                                                                                                                                                                                         | n/a               |
|                           |         | (c) Explain how missing data were addressed                                                                                                                                                                                                                                                                                                                                                                                                 | 7                 |
|                           |         | (d) If applicable, explain how loss to follow-up was addressed                                                                                                                                                                                                                                                                                                                                                                              | 7                 |
|                           |         | (e) Describe any sensitivity analyses                                                                                                                                                                                                                                                                                                                                                                                                       | None              |
| <b>Results</b>            |         |                                                                                                                                                                                                                                                                                                                                                                                                                                             |                   |
| Participants              | 13*     | (a) Report numbers of individuals at each stage of study—eg numbers potentially eligible, examined for eligibility, confirmed eligible, included in the study, completing follow-up, and analysed<br><i>Author note: we cite "About the cohort" papers for all 3 cohorts in addition to Professor Wadsworth's book which provides further information. We would happily include further information in the paper if required but with 3</i> | 8                 |
|                           |         | (b) Give reasons for non-participation at each stage                                                                                                                                                                                                                                                                                                                                                                                        |                   |
|                           |         | (c) Consider use of a flow diagram                                                                                                                                                                                                                                                                                                                                                                                                          |                   |

*birth cohorts we felt this was too much*

|                          |     |                                                                                                                                                                                                              |       |
|--------------------------|-----|--------------------------------------------------------------------------------------------------------------------------------------------------------------------------------------------------------------|-------|
| Descriptive data         | 14* | (a) Give characteristics of study participants (eg demographic, clinical, social) and information on exposures and potential confounders                                                                     | 13    |
|                          |     | (b) Indicate number of participants with missing data for each variable of interest                                                                                                                          |       |
|                          |     | (c) Summarise follow-up time (eg, average and total amount)                                                                                                                                                  | n/a   |
| Outcome data             | 15* | Report numbers of outcome events or summary measures over time                                                                                                                                               | 8     |
| Main results             | 16  | (a) Give unadjusted estimates and, if applicable, confounder-adjusted estimates and their precision (eg, 95% confidence interval). Make clear which confounders were adjusted for and why they were included | 13    |
|                          |     | (b) Report category boundaries when continuous variables were categorized                                                                                                                                    | NA    |
|                          |     | (c) If relevant, consider translating estimates of relative risk into absolute risk for a meaningful time period                                                                                             | NA    |
| Other analyses           | 17  | Report other analyses done—eg analyses of subgroups and interactions, and sensitivity analyses                                                                                                               | None  |
| <b>Discussion</b>        |     |                                                                                                                                                                                                              |       |
| Key results              | 18  | Summarise key results with reference to study objectives                                                                                                                                                     | 8-9   |
| Limitations              | 19  | Discuss limitations of the study, taking into account sources of potential bias or imprecision. Discuss both direction and magnitude of any potential bias                                                   | 9-10  |
| Interpretation           | 20  | Give a cautious overall interpretation of results considering objectives, limitations, multiplicity of analyses, results from similar studies, and other relevant evidence                                   | 11-12 |
| Generalisability         | 21  | Discuss the generalisability (external validity) of the study results                                                                                                                                        | 11-12 |
| <b>Other information</b> |     |                                                                                                                                                                                                              |       |
| Funding                  | 22  | Give the source of funding and the role of the funders for the present study and, if applicable, for the original study on which the present article is based                                                | 19    |

\*Give information separately for exposed and unexposed groups.

**Note:** An Explanation and Elaboration article discusses each checklist item and gives methodological background and published examples of transparent reporting. The STROBE checklist is best used in conjunction with this article (freely available on the Web sites of PLoS Medicine at <http://www.plosmedicine.org/>, Annals of Internal Medicine at <http://www.annals.org/>, and Epidemiology at <http://www.epidem.com/>). Information on the STROBE Initiative is available at <http://www.strobe-statement.org>.



**The association between childhood cognitive ability and adult long term sickness absence in 3 British birth cohorts: a cohort study**

|                                 |                                                                                                                                                                                                                                                                                                                           |
|---------------------------------|---------------------------------------------------------------------------------------------------------------------------------------------------------------------------------------------------------------------------------------------------------------------------------------------------------------------------|
| Journal:                        | <i>BMJ Open</i>                                                                                                                                                                                                                                                                                                           |
| Manuscript ID:                  | bmjopen-2011-000777.R1                                                                                                                                                                                                                                                                                                    |
| Article Type:                   | Research                                                                                                                                                                                                                                                                                                                  |
| Date Submitted by the Author:   | 22-Feb-2012                                                                                                                                                                                                                                                                                                               |
| Complete List of Authors:       | HENDERSON, MAX; INSTITUTE OF PSYCHIATRY, KINGS COLLEGE LONDON, PSYCHOLOGICAL MEDICINE<br>Richards, Marcus; MRC Unit for Lifelong Health and Aging, Stansfeld, Stephen; Barts and the London, Queen Marys School of Medicine and Dentistry, Neurology<br>Hotopf, Matthew; King's College London (Institute of Psychiatry), |
| <b>Primary Subject Heading</b>: | Occupational and environmental medicine                                                                                                                                                                                                                                                                                   |
| Secondary Subject Heading:      | Public health, Epidemiology                                                                                                                                                                                                                                                                                               |
| Keywords:                       | OCCUPATIONAL & INDUSTRIAL MEDICINE, EPIDEMIOLOGY, PUBLIC HEALTH                                                                                                                                                                                                                                                           |
|                                 |                                                                                                                                                                                                                                                                                                                           |

SCHOLARONE™  
Manuscripts

1 RESEARCH CHECKLIST: The association between childhood cognitive ability and long term sickness absence in 3  
 2 British birth cohorts  
 3

|                           | Item No | Recommendation                                                                                                                                                                                                                                                                                                                                                                                                                                                                                                                                        | Page no. in paper |
|---------------------------|---------|-------------------------------------------------------------------------------------------------------------------------------------------------------------------------------------------------------------------------------------------------------------------------------------------------------------------------------------------------------------------------------------------------------------------------------------------------------------------------------------------------------------------------------------------------------|-------------------|
| <b>Title and abstract</b> | 1       | (a) Indicate the study's design with a commonly used term in the title or the abstract                                                                                                                                                                                                                                                                                                                                                                                                                                                                | 1                 |
|                           |         | (b) Provide in the abstract an informative and balanced summary of what was done and what was found                                                                                                                                                                                                                                                                                                                                                                                                                                                   | 2                 |
| <b>Introduction</b>       |         |                                                                                                                                                                                                                                                                                                                                                                                                                                                                                                                                                       |                   |
| Background/rationale      | 2       | Explain the scientific background and rationale for the investigation being reported                                                                                                                                                                                                                                                                                                                                                                                                                                                                  | 3-4               |
| Objectives                | 3       | State specific objectives, including any prespecified hypotheses                                                                                                                                                                                                                                                                                                                                                                                                                                                                                      | 4                 |
| <b>Methods</b>            |         |                                                                                                                                                                                                                                                                                                                                                                                                                                                                                                                                                       |                   |
| Study design              | 4       | Present key elements of study design early in the paper                                                                                                                                                                                                                                                                                                                                                                                                                                                                                               | 4                 |
| Setting                   | 5       | Describe the setting, locations, and relevant dates, including periods of recruitment, exposure, follow-up, and data collection                                                                                                                                                                                                                                                                                                                                                                                                                       | 4-7               |
| Participants              | 6       | (a) Give the eligibility criteria, and the sources and methods of selection of participants. Describe methods of follow-up<br><i>Author note: Our study used data from 3 British birth cohorts, all of which have been extensively investigated and reported on</i>                                                                                                                                                                                                                                                                                   | 4-5               |
|                           |         | (b) For matched studies, give matching criteria and number of exposed and unexposed                                                                                                                                                                                                                                                                                                                                                                                                                                                                   | NA                |
| Variables                 | 7       | Clearly define all outcomes, exposures, predictors, potential confounders, and effect modifiers. Give diagnostic criteria, if applicable                                                                                                                                                                                                                                                                                                                                                                                                              |                   |
| Data sources/measurement  | 8*      | For each variable of interest, give sources of data and details of methods of assessment (measurement). Describe comparability of assessment methods if there is more than one group                                                                                                                                                                                                                                                                                                                                                                  | 5-7               |
| Bias                      | 9       | Describe any efforts to address potential sources of bias                                                                                                                                                                                                                                                                                                                                                                                                                                                                                             | 9-10              |
| Study size                | 10      | Explain how the study size was arrived at<br><i>Author note: we used data from 3 well established birth cohorts and have cited detailed descriptions of each</i>                                                                                                                                                                                                                                                                                                                                                                                      |                   |
| Quantitative variables    | 11      | Explain how quantitative variables were handled in the analyses. If applicable, describe which groupings were chosen and why                                                                                                                                                                                                                                                                                                                                                                                                                          | 6-7               |
| Statistical methods       | 12      | (a) Describe all statistical methods, including those used to control for confounding                                                                                                                                                                                                                                                                                                                                                                                                                                                                 | 7                 |
|                           |         | (b) Describe any methods used to examine subgroups and interactions                                                                                                                                                                                                                                                                                                                                                                                                                                                                                   | n/a               |
|                           |         | (c) Explain how missing data were addressed                                                                                                                                                                                                                                                                                                                                                                                                                                                                                                           | 7                 |
|                           |         | (d) If applicable, explain how loss to follow-up was addressed                                                                                                                                                                                                                                                                                                                                                                                                                                                                                        | 7                 |
|                           |         | (e) Describe any sensitivity analyses                                                                                                                                                                                                                                                                                                                                                                                                                                                                                                                 | None              |
| <b>Results</b>            |         |                                                                                                                                                                                                                                                                                                                                                                                                                                                                                                                                                       |                   |
| Participants              | 13*     | (a) Report numbers of individuals at each stage of study—eg numbers potentially eligible, examined for eligibility, confirmed eligible, included in the study, completing follow-up, and analysed<br><br>(b) Give reasons for non-participation at each stage<br><br>(c) Consider use of a flow diagram<br><br><i>Author note: we cite "About the cohort" papers for all 3 cohorts in addition to Professor Wadsworth's book which provides further information. We would happily include further information in the paper if required but with 3</i> | 8                 |

*birth cohorts we felt this was too much*

|                          |     |                                                                                                                                                                                                              |       |
|--------------------------|-----|--------------------------------------------------------------------------------------------------------------------------------------------------------------------------------------------------------------|-------|
| Descriptive data         | 14* | (a) Give characteristics of study participants (eg demographic, clinical, social) and information on exposures and potential confounders                                                                     | 13    |
|                          |     | (b) Indicate number of participants with missing data for each variable of interest                                                                                                                          |       |
|                          |     | (c) Summarise follow-up time (eg, average and total amount)                                                                                                                                                  | n/a   |
| Outcome data             | 15* | Report numbers of outcome events or summary measures over time                                                                                                                                               | 8     |
| Main results             | 16  | (a) Give unadjusted estimates and, if applicable, confounder-adjusted estimates and their precision (eg, 95% confidence interval). Make clear which confounders were adjusted for and why they were included | 13    |
|                          |     | (b) Report category boundaries when continuous variables were categorized                                                                                                                                    | NA    |
|                          |     | (c) If relevant, consider translating estimates of relative risk into absolute risk for a meaningful time period                                                                                             | NA    |
| Other analyses           | 17  | Report other analyses done—eg analyses of subgroups and interactions, and sensitivity analyses                                                                                                               | None  |
| <b>Discussion</b>        |     |                                                                                                                                                                                                              |       |
| Key results              | 18  | Summarise key results with reference to study objectives                                                                                                                                                     | 8-9   |
| Limitations              | 19  | Discuss limitations of the study, taking into account sources of potential bias or imprecision. Discuss both direction and magnitude of any potential bias                                                   | 9-10  |
| Interpretation           | 20  | Give a cautious overall interpretation of results considering objectives, limitations, multiplicity of analyses, results from similar studies, and other relevant evidence                                   | 11-12 |
| Generalisability         | 21  | Discuss the generalisability (external validity) of the study results                                                                                                                                        | 11-12 |
| <b>Other information</b> |     |                                                                                                                                                                                                              |       |
| Funding                  | 22  | Give the source of funding and the role of the funders for the present study and, if applicable, for the original study on which the present article is based                                                | 19    |

\*Give information separately for exposed and unexposed groups.

**Note:** An Explanation and Elaboration article discusses each checklist item and gives methodological background and published examples of transparent reporting. The STROBE checklist is best used in conjunction with this article (freely available on the Web sites of PLoS Medicine at <http://www.plosmedicine.org/>, Annals of Internal Medicine at <http://www.annals.org/>, and Epidemiology at <http://www.epidem.com/>). Information on the STROBE Initiative is available at <http://www.strobe-statement.org>.



1  
2  
3 The association between childhood cognitive ability and adult long term sickness absence in 3 British  
4 birth cohorts: a cohort study  
5  
6

7 Dr Max Henderson\*  
8 Senior Lecturer in Epidemiological & Occupational Psychiatry  
9 Institute of Psychiatry, Kings College London  
10 Department of Psychological Medicine  
11 Weston Education Centre, Cutcombe Road  
12 London SE5 9RJ  
13 UK  
14

15 Professor Marcus Richards  
16 Programme Leader  
17 MRC Unit for Lifelong Health and Aging  
18 33 Bedford Place  
19 London WC1B 5JU  
20 UK  
21  
22

23 Professor Stephen Stansfeld  
24 Professor of Psychiatry  
25 Centre for Psychiatry  
26 Wolfson Institute for Preventive Medicine  
27 Barts and the London School of Medicine and Dentistry  
28 London EC1M 6BQ  
29 UK  
30  
31

32 Professor Matthew Hotopf  
33 Professor of General Hospital Psychiatry  
34 Institute of Psychiatry, Kings College London  
35 Department of Psychological Medicine  
36 Weston Education Centre, Cutcombe Road  
37 London SE5 9RJ  
38 UK  
39  
40  
41  
42

43 \* corresponding author

44 T: 020 3228 8564

45 F: 020 7848 5408

46 E: max.j.henderson@kcl.ac.uk  
47  
48  
49  
50  
51  
52  
53  
54  
55  
56  
57  
58  
59  
60

## ABSTRACT

Objectives: We aimed to test the relationship between childhood cognitive function and long term sick leave in adult life, and whether any relationship was mediated by educational attainment, adult social class or adult mental ill health

Design: Cohort study

Setting: We used data from the 1946, 1958 and 1970 British birth cohorts. Initial study populations included all live births in one week in that year. Follow-up arrangements have differed between the cohorts.

Participants: We included only those alive, living in the UK, and not permanent refusals at the time of the outcome. We further restricted analyses to those in employment, full-time education, or caring for a family in the sweep immediately prior to the outcome. 2894 (1946), 15 053 (1958) and 14 713 (1970) cohort members were included.

Primary and secondary outcome measures: Receipt of health-related benefits (e.g. incapacity benefit) in 2000 and 2004 for the 1958 and 1970 cohorts respectively; individuals identified as "permanently sick or disabled" in 1999 for 1946 cohort.

Results: After adjusting for sex and parental social class better cognitive function at age 10/11 was associated with reduced odds of being long term sick (1946: 0.70(0.56,0.86)  $p=0.001$ ; 1958 (0.69 (0.61,0.77) $p<0.001$ ; 1970 0.80 (0.66,0.97)  $p=0.003$ ). Educational attainment appeared to partly mediate the associations in all cohorts; adult social class appeared to have a mediating role in the 1946 cohort.

Conclusions: Long term sick leave is a complex outcome with many risk factors beyond health. Cognitive abilities might impact on the way individuals are able to develop strategies to maintain their employment or rapidly find new employment when faced with a range of difficulties. Education should form part of the policy response to long term sick leave such that young people are better equipped with skills needed in a flexible labour market.

## BACKGROUND

In the UK over 2.5 million people are in receipt of health-related benefits (HRBs) including Incapacity Benefit and Employment and Support allowance, most often paid to those off work for more than 6 months due to ill health<sup>1</sup>. The cost to the economy from reduced tax revenues and payment of benefits is in excess of £50 billion per year<sup>2</sup>. Reducing long term sick leave is thus high

1  
2  
3 on the agenda for policy makers<sup>3 4</sup>. Long term sick leave increases poverty in the sick, and is  
4 associated with premature mortality<sup>5-7</sup>. At the individual level long term sick leave means a loss of  
5 income and dignity, and with this a reduced opportunity for social participation<sup>2</sup>. 50% of those in  
6 receipt of an HRB have been claiming for more than 5 years, and those claiming for 2 years are more  
7 likely to die or retire than get another job<sup>8</sup>. Long term sick leave increases and sustains poverty and  
8 social disadvantage.

9  
10  
11  
12  
13  
14  
15 Mental and musculoskeletal disorders are the most common reasons to be awarded an HRB<sup>2 9 10</sup>.

16  
17  
18  
19  
20  
21  
22  
23  
24  
25  
26  
27  
28  
29  
30  
31  
32  
33  
34  
35  
36  
37  
38  
39  
40  
41  
42  
43  
44  
45  
46  
47  
48  
49  
50  
51  
52  
53  
54  
55  
56  
57  
58  
59  
60  
Much of the policy response to sickness absence has focussed on reducing occupational risk factors  
for these disorders. However there is a disconnect between the increase in incapacity benefit  
certifications and the distribution of risk factors in the workplace. Musculoskeletal disorders rose at a  
time when the physical demands of work decreased<sup>11</sup>, and workplaces became increasingly safe<sup>12</sup>.

Similarly the increase in awards of HRBs due to psychiatric disorders was not associated with a  
concomitant rise in the prevalence of these disorders within the working age population. Further, the  
relationship between health and occupational function is unclear - whilst there are 2.5 million people  
in the UK on IB, over 3 million people with a range of disabilities manage to remain in paid work<sup>13</sup>.

Relatively few studies have examined individual, as opposed to occupational, risk factors for long  
term sick leave<sup>14</sup>. Some difficulties apparent in childhood are associated: data from the Aberdeen  
Children of the Nineteen Fifties Cohort<sup>15</sup> indicated that emotional or behavioural difficulties were  
associated with being permanently sick or disabled nearly 40 years later. Similar findings have been  
shown for adolescent mental disorders in a Swedish cohort<sup>16</sup>. Another early risk factor might be  
cognitive ability: the Aberdeen study indicated that low cognitive ability independently predicted  
being permanently sick or disabled in adult life. Work by Gravseth found that low birth weight and a  
failure to complete secondary education predicted the award of a disability pension in a cohort of  
Norwegians born between 1967 and 1976<sup>17</sup>. The same author has shown that lower intellectual  
performance at age 18 or 19, and educational attainment at age 23 were each independently associated  
with the award of a disability pension to Norwegian men between the ages of 24 and 36<sup>18</sup>.

1  
2  
3 Low IQ might explain the association of both childhood behavioural problems and poor educational  
4 attainment with long term sickness absence in adult life. If this were the case, a response at policy  
5 level which emphasised the attributed health reasons for long term sick leave and responded by trying  
6 to improve the health “offer” to this group may be less than successful. By contrast one that looked  
7 beyond a diagnostic label and emphasised skills and training, especially tailored to the needs of the  
8 least cognitively able, might produce better results.  
9  
10  
11  
12  
13

14  
15 We tested the hypothesis that lower cognitive ability is a risk factor for long term sickness absence in  
16 three British birth cohorts. We further aimed to determine whether such an association is mediated by  
17 educational attainment, adult social class, or adult mental health.  
18  
19  
20

## 21 METHODS

22  
23 We used data from the 3 British birth cohorts whose participants are now working age<sup>19</sup>.

### 24 *The National Survey of Health and Development*

25  
26  
27  
28  
29  
30 The 1946 National Survey of Health and Development (NSHD) obtained information on all singleton  
31 births to married women in England Scotland and Wales in a single week in March 1946<sup>20</sup>. An initial  
32 sample of 5362 were then followed up, comprising all those with fathers in non-manual and  
33 agricultural employment and a 1:4 sample of those with fathers in manual employment. The cohort is  
34 described in detail elsewhere<sup>20</sup>. In 1999, 3760 of the 5362 were alive, living in the UK and were not  
35 permanent refusals. Of these 3035 (81%) provided data to the study. This group (weighted to adjust  
36 for the sampling procedure) are broadly representative of the population born in 1946 in the UK,  
37 although there was over-representation among non-responders of the never married and the least  
38 advantaged in terms of cognitive ability, educational attainment, and social class<sup>21</sup>.  
39  
40  
41  
42  
43  
44  
45  
46  
47

### 48 *The National Child Development Study*

49  
50  
51 The 1958 National Childhood Development Study (NCDS) included all surviving children born in  
52 England Scotland and Wales in a single week in March 1958. During follow-up ‘sweeps’ immigrant  
53 children who would have been part of the study had they been born in the UK were added. The cohort  
54  
55  
56  
57  
58  
59  
60

1  
2  
3 is described in detail elsewhere<sup>22</sup>. In 2000, 16147 were still eligible to take part and 11419 (71%)  
4  
5 contributed data.

### 6 7 *The British Cohort Study*

8  
9  
10 The 1970 British Cohort Study (BCS) included all live births in one week in April 1970 in the whole  
11  
12 United Kingdom. Children born in Northern Ireland were subsequently dropped from follow-up. The  
13  
14 cohort is described in detail elsewhere<sup>23</sup>. In 2004, excluding those who had died, emigrated, been  
15  
16 born in Northern Ireland or were permanent refusals 16875 were eligible to take part of whom 9656  
17  
18 (59%) contributed data.

### 19 20 21 *Outcome*

22  
23 In all cohorts data on the outcome, long term sick leave, were extracted from the most recent dataset  
24  
25 at the time the present project began: for the 1946 cohort this was in 1999 when participants were  
26  
27 aged 53 years; for the 1958 cohort in 2000, when participants were aged 42, and in the 1970 cohort in  
28  
29 2004, when participants were aged 34.

30  
31  
32 In both the 1958 and 1970 cohort, participants were asked if they were in receipt of any benefit  
33  
34 payments. Individuals reporting receipt of Incapacity Benefit (IB) or Severe Disablement Allowance  
35  
36 were identified as being on long term sick leave. Typically these participants were off work for health  
37  
38 reasons for more than 6 months. Data on benefit receipt were not available for the 1946 birth cohort in  
39  
40 1999. Instead participants were asked (yes/no) if they were in a job. Those who responded 'No' were  
41  
42 asked (yes/no) if they were looking for work. Those who also replied 'No' to this question were asked  
43  
44 why and asked to select a response from 6 options, one of which was "Permanently sick or disabled".  
45  
46 Individuals reporting this option as the reason they were not looking for work were identified as being  
47  
48 on long term sick leave. We have previously described research using this category in the Aberdeen  
49  
50 Children of the Nineteen Fifties cohort<sup>15</sup>.

### 51 52 53 *Exposures of interest*

1  
2  
3 The 1946 and 1958 cohorts contain data on participants' cognitive ability at age 11; the 1970 cohort  
4 has a measure at age 10. 1946 cohort members were tested at age 11 on verbal and non-verbal  
5 intelligence, arithmetic, word pronunciation, and vocabulary. Scores were summed to represent  
6 overall cognitive ability. The cognitive ability of the 1958 cohort members was assessed using the  
7 General Ability Test<sup>24</sup>. 1970 cohort members completed a modified version of the British Ability  
8 Scales (BAS)<sup>25</sup>. A principal components analysis was performed on the four subscales of the BAS  
9 and the first factor was taken as a general measure of cognitive ability<sup>26</sup>. For all cohorts cognitive  
10 ability scores were divided into quartiles and the first (lowest cognitive ability) used as the reference  
11 group.  
12  
13  
14  
15  
16  
17  
18  
19  
20

21  
22 In all three cohorts occupation of the father at the time of the participants' birth was coded according  
23 to the Registrar General's classification. For these analyses social class was categorised as Class I/II,  
24 Class III (non-manual and manual) and Class IV/V. Participants were asked about their current or  
25 most recent job, and these were similarly coded. Common mental disorders are the most common  
26 reason for sick leave<sup>9</sup>. All cohorts contained a measure of depression or psychological distress. 1946  
27 cohort members were administered the Present state Examination<sup>27</sup> at age 36 years, and depression in  
28 the preceding year was derived from the CATEGO algorithm<sup>27</sup>. 1958 cohort members were  
29 administered the Malaise Inventory<sup>28</sup> in 1991. Those scoring 8/24 or more were identified as 'cases'  
30 of depression<sup>29</sup>. 1970 cohort members were administered the 12-item General Health Questionnaire<sup>30</sup>  
31 in 2000. Participants scoring 4 or more were identified as cases of psychological distress/depression  
32  
33  
34  
35  
36  
37  
38  
39  
40  
41  
42  
43  
44  
45  
46  
47  
48  
49  
50  
51  
52  
53  
54  
55  
56  
57  
58  
59  
60

The highest level of educational qualification was available in the 1946, 1958 and 1970 cohorts at  
ages 26, 33 and 26 years, respectively. All 3 cohorts categorised this information differently and thus  
all data were re-coded into degree; A level or equivalent; O level or equivalent; CSE grade 2-5; no  
qualifications.

*Risk set*

1  
2  
3 At any time-point the workless population is a heterogeneous one, comprising individuals on short-  
4 term sick leave, individuals on long-term sick leave and some individuals who, for whatever reason,  
5 have never worked. Many of this latter group will have substantial health difficulties such as severe  
6 physical disabilities or learning disabilities. Our outcome was long term sick leave, and therefore in  
7 all 3 cohorts analyses were restricted to those participants who described themselves as either in  
8 employment or full-time education, or caring for a family in the sweep immediately prior to that from  
9 which the outcome was derived (1946 cohort - 1989; 1958 cohort - 1991; 1970 cohort - 2000). This  
10 restriction removed 23%, 7% and 13% of the participants respectively. Post-hoc analysis showed  
11 these participants had very high rates of HRB receipt.  
12  
13  
14  
15  
16  
17  
18  
19  
20  
21

### 22 *Statistical Analyses*

23  
24 All data were analysed using STATA version 9.2<sup>32</sup>. As with all longitudinal studies, partial data  
25 collection and loss to follow-up meant that there were incomplete data on participants in all 3 cohorts.  
26 To minimise the impact of missing data multiple imputation using chained equations (ICE)<sup>33</sup> was  
27 carried out<sup>32</sup>. All variables were included in the imputation model<sup>34</sup>. 10 iterations were completed.  
28 The MICOMBINE function was used to calculate average regression estimates across the 10 imputed  
29 datasets.  
30  
31  
32  
33  
34  
35  
36

37 For each cohort the prevalence of each of the exposures of interest was calculated. The unadjusted  
38 association between childhood cognitive ability and long term sickness absence was estimated and  
39 shown as odds ratios (OR), with 95% confidence intervals, for each of the four quartiles of childhood  
40 cognition compared to the reference, and for the overall trend. These were then adjusted for the  
41 potential confounders of sex and social class at birth. Finally, to examine the potential mediating  
42 effects of covariables measured in adult life, adult social class, educational attainment and history of  
43 recent depression or psychological distress were each added to the model.  
44  
45  
46  
47  
48  
49  
50

## 51 RESULTS

52  
53  
54 In 1999 2894 members of the 1946 cohort were eligible for this study, of whom 159 (5.5%) reported  
55 themselves as permanently sick or disabled. In 2000 there were 15 053 eligible members of the 1958  
56  
57  
58  
59  
60

1  
2  
3 cohort, of whom 431(2.9%) were in receipt of long term sickness benefits. In 2004 there were 14 713  
4 eligible members of the 1970 cohort, of whom 153 (1.04%) were in receipt of long term sickness  
5 benefits. The distribution of the covariables in each of the birth cohorts is shown in table 1.  
6  
7

8  
9  
10 [Table 1 about here].  
11

12 The associations between childhood cognitive ability and long term sickness absence, adjusted for the  
13 covariables are shown in Table 2. This shows that for each cohort there is a strong impact of cognitive  
14 ability measured in childhood on the outcome several decades later. The top quartile showed between  
15 one quart and one half the odds of long term sickness absence depending upon the cohort studied. The  
16 effect was present after adjusting for sex and paternal social class (model 2). When potential  
17 mediating variables were added, effects were reduced. Adding social class in adulthood diminished  
18 effect sizes, particularly in the 1946 birth cohort. The overall impact of cognition on the outcome was  
19 statistically significant in two of the three cohorts. Adjusting for educational attainment also led to a  
20 reduction in effect sizes, with one cohort (the 1958) showing a significant trend of cognition on the  
21 outcome, whereas the others showed a marginally statistically significant effect, although the ORs for  
22 the lowest quartile were still of the order of two. Adjusting for prior mental disorder had little impact,  
23 with all three of the cohorts showing an independent effect of cognition on long term sickness  
24 absence. Finally, a full model controlling for all covariates simultaneously, showed a reduction in the  
25 effect of cognition on long term sickness, with one of the three cohorts (1958) remaining significant.  
26  
27  
28  
29  
30  
31  
32  
33  
34  
35  
36  
37  
38  
39

40 [Table 2 about here]  
41

## 42 DISCUSSION

### 43 *Summary of findings*

44  
45  
46 We examined associations between cognitive ability measured in childhood and long term sickness  
47 absence in adult life across three British birth cohorts. In all three cohorts the effects after adjustment  
48 for sex and social class at birth were similar, and all three demonstrated a clear dose-response effect  
49 whereby lower childhood cognitive ability was more strongly associated with long-term sick leave. In  
50 each cohort there was little attenuation when previous history of depression was included. There was  
51  
52  
53  
54  
55  
56  
57  
58  
59  
60



1  
2  
3 some attenuation of the effect when adult social class and, particularly, educational attainment was  
4 included, and this attenuation was greater for those of lower cognitive ability. This suggests that some  
5 of the effect of lower cognitive ability is mediated by educational attainment. For example low  
6 educational attainment might lead to more insecure jobs or more manual jobs that could be more  
7 difficult to sustain in the context of disability. However educational attainment does not fully explain  
8 the association.  
9  
10  
11  
12  
13

#### 14 *Strengths and weaknesses*

15  
16 Strengths of this study include the use of data from three British cohorts across half a century, with  
17 outcome data from both early (age 34) and late career (age 53), thus these results seem to transcend  
18 period effects. These cohorts are broadly representative of the population born in UK in the years of  
19 their inception. Those relatively disadvantaged were more likely to be under-represented, but we  
20 have no reason to believe that this would have altered the pattern of results reported here. Exposures  
21 were measured long before the outcomes occurred, and cognitive ability was assessed using well  
22 recognised tools. Exposures in adult life were assessed independently of the research question,  
23 limiting the impact of reporting bias.  
24  
25  
26  
27  
28  
29  
30  
31  
32  
33

34  
35 Weaknesses include the different assessment tools used to measure childhood cognitive ability in each  
36 cohort which raises questions of comparability of results between cohorts. Paternal social class at  
37 birth was assessed by asking the participant's mother. There is likely to be a degree of  
38 misclassification here, most notable in the 1946 cohort as many fathers were just returning from the  
39 war. We believe any such misclassification is likely to be random. Although the associations between  
40 lower cognitive ability and long term sick leave remain after adjustment for parental social class we  
41 are mindful of the possibility of residual confounding from unmeasured variables acting in early life  
42 which might influence both childhood cognitive ability and adult ill-health. We used three birth  
43 cohorts each of which has included a number of sweeps over at least 30 years. Non-participation in  
44 the more recent sweeps of the 1946 cohort is associated with socio-economic disadvantage, and in the  
45 1958 and 1970 cohorts with male sex and lower educational attainment. Although the remaining  
46  
47  
48  
49  
50  
51  
52  
53  
54  
55  
56  
57  
58  
59  
60

1  
2  
3 participants are still broadly representative of their generations and we have used multiple imputation  
4  
5 to minimise the impact of loss to follow-up it is possible that our cohort data is to some degree biased.  
6  
7 Any resulting error would, however, tend to underestimate the association between childhood  
8  
9 cognitive function and later occupational function.

10  
11 Depression or psychological distress was measured using different self-report tools in all three  
12  
13 cohorts. Only recent difficulties were asked for and as with all cohort studies the data are silent as to  
14  
15 what happens between ‘sweeps’. A more robust measure of depression which identified episodes of  
16  
17 illness between sweeps would have been preferable. We included depression in this analysis as it is  
18  
19 the leading cause of long term sick leave. Given the two-way relationship between physical and  
20  
21 mental ill health our results would have been illuminated had we included measures of physical illness  
22  
23 in childhood and in adult life.

24  
25  
26 There is no accepted definition of long term sick leave. Although available in the 1958 and 1970  
27  
28 cohorts, receipt of Incapacity Benefit was not available in the 1946 cohort and this is a limitation.  
29  
30 Nonetheless we believe the population captured under the heading “permanently sick or disabled” at  
31  
32 age 53 to be very similar to those indentified as being in receipt of IB. Most IB recipients have been  
33  
34 away from work for over 6 months. There are other routes in to incapacity benefit but the median time  
35  
36 spent on IB is 5 years and the advantages of using this outweigh any limitations. The population we  
37  
38 have studied represents the persistent and severe long term absentees. IB receipt is a binary question,  
39  
40 asked relatively context free and this will minimise any recall, reporting or observer bias, and any  
41  
42 misclassification is likely to be random. Furthermore we believe our findings have greater salience for  
43  
44 policy makers as notwithstanding the introduction of Employment and Support Allowance they can be  
45  
46 mapped straight onto the existing UK benefits framework.

47  
48  
49 The effect sizes we have demonstrated are noticeably similar between the cohorts despite the  
50  
51 differences in the cohorts and the methods used to assess cognitive ability. The impact of cognitive  
52  
53 ability on later long term sickness absence attained conventional statistical significance in all three  
54  
55 cohorts though most strongly for the 1958 cohort. The higher P value in the 1946 cohorts reflects the

1  
2  
3 smaller size of the cohort (less than half that of the other two). In the 1970 cohort the outcome was  
4 rare (1%) and hence statistical power was greatest in the 1958 cohort. Our results cannot be accounted  
5 for by the people with very low cognitive ability never entering the labour force as we restricted our  
6 analyses to only those were either working or fulfilling other social roles (caring for a family or  
7 studying) at the previous sweep.  
8  
9

10  
11  
12  
13 There are no data on the cognitive abilities of people claiming Incapacity Benefit. Our study shows  
14 that the bottom two quartiles of cognitive ability are responsible for a considerable proportion of the  
15 IB recipient population. We present regression models showing the impact of controlling for a  
16 number of variables on these associations. It is worth noting that we do not consider these factors  
17 predominantly as confounders – in other words, although the association between cognition is  
18 attenuated and becomes non-significant in two of the three cohorts when educational attainment, adult  
19 social class, and depression are controlled, this does not indicate that the univariate association  
20 between cognition and long term sickness absence is merely a result of confounding. Rather, we  
21 consider it probable that these variables are mediators of the association. Thus the association  
22 between lower cognitive status and long term sickness absence is in part explained by a pathway via  
23 educational attainment and adult social class. It should be noted however that the relationships  
24 between risk factors identified in early life, education, health and employment factors in leading to the  
25 receipt of HRBs is not clear and is likely to be complex.  
26  
27  
28  
29  
30  
31  
32  
33  
34  
35  
36  
37  
38  
39

40 There is an extensive literature on the health implications of low cognitive ability<sup>35-37</sup>. However we  
41 think it unlikely that the association we gave described between low cognitive ability in childhood and  
42 adult occupational outcomes is simply because these individuals are more likely to become unwell.  
43 First, we have deliberately not attempted to ascertain the clinical labels as to why an individual is in  
44 receipt of IB – the effect of cognitive ability is substantial enough to be observed at cohort level.  
45 Second, the very limited attenuating effect of depression in all three cohorts suggests that the  
46 mechanism behind this association is largely independent of mental health, the most common reason  
47 for long term sick leave. This is also suggested by the consistency of results across the three cohorts  
48 as the health difficulties suffered by those in their thirties are likely to be different to those suffered by  
49  
50  
51  
52  
53  
54  
55  
56  
57  
58  
59  
60

1  
2  
3 people in their fifties. Last, whilst previous work on the 1946 cohort<sup>38</sup>, replicating work on the 1958  
4 and 1970 cohorts<sup>26 39-41</sup>, has shown an association between cognitive ability and adult chronic physical  
5 diseases, these associations were mediated by education and to a lesser degree socioeconomic status,  
6  
7 both of which are included in our analyses.  
8  
9

10  
11 In trying to understand how childhood cognitive function affects adult occupational function it is  
12 important to recognise that long term sick leave is the result of a process rather than an event<sup>10</sup>. These  
13 data are unable to tell us if lower cognitive ability makes it more likely that an individual with a  
14 particular disorder or set of symptoms is more likely to go off work sick, or less able to get  
15 appropriate support when they are ill, or find it more difficult to negotiate a successful return to work  
16 after a period of ill health. Cognitive ability might impact on any or all of these, possibly in “soft”  
17 ways such as by directing responses to illness or by facilitating the recruitment of support from health  
18 professionals, line managers, colleagues and friends. Such a model has previously been proposed for  
19 the association between IQ and mortality<sup>42</sup>. The important role of education, identified in all three  
20 cohorts, is consistent with this idea. Low cognitive ability and/or low educational attainment are likely  
21 to be associated with a limited ability to transfer skills. So, for example, if an individual with few  
22 skills goes off sick from a labouring job, the options with regard to alternative employment are few.  
23  
24 The change in last 40 years from a manufacturing economy to a service-based economy makes such a  
25 lack of flexibility all the more problematic.  
26  
27

28  
29 Our findings suggest that health is only one factor in understanding long term sickness absence. We  
30 suggest that education should form part of the policy response to long term sickness absence: for  
31 future generations equipping children with skills necessary for labour market flexibility may inoculate  
32 them from the risk of long term sickness absence. For the present cohorts of individuals on incapacity  
33 benefits it is important to recognise that their cognitive abilities may be below average and that the  
34 most fruitful approach to rehabilitation may be to improve skills. More broadly the devastating  
35 outcome of long term worklessness for those with health problems needs to be seen as having its roots  
36 as much in a combination of individual risk factors as in the health and workplace factors which have  
37 been the basis for much of the policy response to date.  
38  
39

1  
2  
3  
4  
5  
6  
7  
8  
9  
10  
11  
12  
13  
14  
15  
16  
17  
18  
19  
20  
21  
22  
23  
24  
25  
26  
27  
28  
29  
30  
31  
32  
33  
34  
35  
36  
37  
38  
39  
40  
41  
42  
43  
44  
45  
46  
47  
48  
49  
50  
51  
52  
53  
54  
55  
56  
57  
58  
59  
60

For peer review only

Table 1 Distribution of covariables in 3 British birth cohorts

|                                       |                                | 1946 cohort           |                              | 1958 cohort             |                              | 1970 cohort             |                              |
|---------------------------------------|--------------------------------|-----------------------|------------------------------|-------------------------|------------------------------|-------------------------|------------------------------|
|                                       |                                | Whole cohort (n=2894) | Long term sick leave (n=159) | Whole cohort (n=15 053) | Long term sick leave (n=431) | Whole cohort (n=14 713) | Long term sick leave (n=153) |
| <b>Sex</b>                            | <b>Male</b>                    | 1561 (54%)            | 72 (45%)                     | 7483 (50%)              | 190 (44%)                    | 7373 (50%)              | 62 (41%)                     |
|                                       | <b>Female</b>                  | 1333 (46%)            | 89 (55%)                     | 7570 (50%)              | 241 (55%)                    | 7340 (50%)              | 91 (59%)                     |
| <b>Social class at birth</b>          | <b>I/II</b>                    | 656 (23%)             | 18 (11%)                     | 2611 (17%)              | 37 (8%)                      | 2431 (17%)              | 20 (13%)                     |
|                                       | <b>III</b>                     | 1505 (52%)            | 76 (47%)                     | 8849 (59%)              | 274 (64%)                    | 10359 (70%)             | 80 (52%)                     |
|                                       | <b>IV/V</b>                    | 733 (25%)             | 67 (42%)                     | 3593 (24%)              | 120 (28%)                    | 1923 (13%)              | 53 (35%)                     |
| <b>Educational attainment</b>         | <b>Degree</b>                  | 30 (1%)               | 1 (0.5%)                     | 1867 (12%)              | 21 (5%)                      | 2708 (18%)              | 16 (10%)                     |
|                                       | <b>A levels</b>                | 270 (9%)              | 3 (2%)                       | 1962 (13%)              | 86 (20%)                     | 2054 (14%)              | 14 (9%)                      |
|                                       | <b>O Levels</b>                | 740 (26%)             | 17 (10.5%)                   | 5200 (35%)              | 143 (33%)                    | 6178 (42%)              | 77 (50%)                     |
|                                       | <b>CSEs</b>                    | 575 (20%)             | 25 (16%)                     | 4204 (28%)              | 79 (18%)                     | 2904 (20%)              | 34 (22%)                     |
|                                       | <b>No qualifications</b>       | 1279 (44%)            | 115 (71%)                    | 1820 (12%)              | 103 (24%)                    | 869 (6%)                | 12 (8%)                      |
| <b>Social class at last sweep</b>     | <b>I/II</b>                    | 1284 (45%)            | 40 (25%)                     | 2675 (18%)              | 55 (13%)                     | 6037 (41%)              | 47 (31%)                     |
|                                       | <b>III</b>                     | 1138 (39%)            | 60 (37%)                     | 7779 (52%)              | 220 (51%)                    | 6159 (42%)              | 64 (42%)                     |
|                                       | <b>IV/V</b>                    | 472 (16%)             | 61 (38%)                     | 4599 (30%)              | 156 (36%)                    | 2517 (17%)              | 42 (27%)                     |
| <b>Previous depression</b>            | <b>Yes</b>                     | 502 (17%)             | 37 (23%)                     | 946 (6%)                | 73 (17%)                     | 3387 (23%)              | 36 (24%)                     |
|                                       | <b>No</b>                      | 2392 (83%)            | 124 (77%)                    | 14107 (94%)             | 358 (83%)                    | 11326 (77%)             | 117 (76%)                    |
| <b>Cognitive ability in childhood</b> | <b>Quartile 1 (least able)</b> | 657 (23%)             | 76 (47%)                     | 3768 (25%)              | 175 (41%)                    | 3663 (25%)              | 49 (32%)                     |
|                                       | <b>Quartile 2</b>              | 707 (24%)             | 37 (23%)                     | 3776 (25%)              | 125 (29%)                    | 3758 (26%)              | 47 (31%)                     |
|                                       | <b>Quartile 3</b>              | 757 (26%)             | 28 (17%)                     | 3907 (26%)              | 77 (18%)                     | 3722 (25%)              | 35 (23%)                     |
|                                       | <b>Quartile 4 (most able)</b>  | 773 (27%)             | 20 (13%)                     | 3602 (24%)              | 54 (12%)                     | 3570 (24%)              | 22 (14%)                     |

1  
2  
3  
4  
5  
6  
7  
8  
9  
10  
11  
12  
13  
14  
15  
16  
17  
18  
19  
20  
21  
22  
23  
24  
25  
26  
27  
28  
29  
30  
31  
32  
33  
34  
35  
36  
37  
38  
39  
40  
41  
42  
43  
44  
45  
46  
47  
48  
49  
50  
51  
52  
53  
54  
55  
56  
57  
58  
59  
60

For peer review only

Table 2. The association between childhood cognitive ability and long term sickness absence in 3 British birth cohorts

|             |                         | Model 1: Unadjusted |         | Model 2: Adjusted for sex, paternal social class |         | Model 2 + adult social class |         | Model 2 + educational attainment |         | Model 2 + depression |         | Adjusted for all covariables |         |
|-------------|-------------------------|---------------------|---------|--------------------------------------------------|---------|------------------------------|---------|----------------------------------|---------|----------------------|---------|------------------------------|---------|
|             |                         | OR (95% CI)         | p       | OR (95% CI)                                      | p       | OR (95% CI)                  | P       | OR (95% CI)                      | P       | OR (95% CI)          | P       | OR (95% CI)                  | p       |
| 1946 cohort | Cognition               | 0.66 (0.53,0.82)    | P<0.001 | 0.70 (0.56,0.86)                                 | P=0.001 | 0.78 (0.63,0.98)             | P=0.04  | 0.80 (0.63,1.02)                 | P=0.07  | 0.69 (0.56,0.86)     | P=0.001 | 0.84 (0.66, 1.07)            | P=0.15  |
|             | Quartile 1 (least able) | 1                   |         | 1                                                |         | 1                            |         | 1                                |         | 1                    |         | 1                            |         |
|             | Quartile 2              | 0.77 (0.46,1.29)    | P=0.32  | 0.84 (0.50,1.42)                                 | P=0.52  | 0.98 (0.57,1.67)             | P=0.93  | 0.95 (0.56,1.61)                 | P=0.84  | 0.84 (0.50,1.41)     | P=0.51  | 1.02 (0.60,1.74)             | P=0.94  |
|             | Quartile 3              | 0.49 (0.27,0.88)    | P=0.02  | 0.54 (0.30,0.96)                                 | P=0.04  | 0.65 (0.36,1.19)             | P=0.17  | 0.67 (0.36,1.24)                 | P=0.21  | 0.52 (0.29,0.95)     | P=0.03  | 0.71 (0.38,1.33)             | P=0.29  |
|             | Quartile 4 (most able)  | 0.26 (0.11,0.58)    | P=0.001 | 0.31 (0.13,0.70)                                 | P=0.005 | 0.44 (0.18,1.05)             | P=0.06  | 0.45 (0.18,1.11)                 | P=0.09  | 0.30 (0.13,0.69)     | P=0.005 | 0.53 (0.21,1.33)             | P=0.17  |
|             |                         |                     |         |                                                  |         |                              |         |                                  |         |                      |         |                              |         |
| 1958 cohort | Cognition               | 0.68 (0.60,0.76)    | P<0.001 | 0.69 (0.61,0.77)                                 | P<0.001 | 0.69 (0.61,0.78)             | P<0.001 | 0.77 (0.67,0.90)                 | P=0.001 | 0.72 (0.64,0.81)     | P<0.001 | 0.79 (0.68,0.92)             | P=0.002 |
|             | Quartile 1 (least able) | 1                   |         | 1                                                |         | 1                            |         | 1                                |         | 1                    |         | 1                            |         |
|             | Quartile 2              | 0.67 (0.51,0.88)    | P=0.004 | 0.68 (0.52,0.89)                                 | P=0.005 | 0.68 (0.52,0.90)             | P=0.006 | 0.78 (0.59,1.03)                 | P=0.09  | 0.72 (0.54,0.94)     | P=0.02  | 0.81 (0.61,1.07)             | P=0.13  |
|             | Quartile 3              | 0.43 (0.31,0.59)    | P<0.001 | 0.44 (0.32, 0.61)                                | P<0.001 | 0.45 (0.33,0.62)             | P<0.001 | 0.56 (0.40,0.79)                 | P=0.001 | 0.49 (0.35,0.68)     | P<0.001 | 0.60 (0.42,0.84)             | P=0.003 |
|             | Quartile 4 (most able)  | 0.32 (0.22,0.48)    | P<0.001 | 0.35 (0.24,0.52)                                 | P<0.001 | 0.36 (0.24,0.54)             | P<0.001 | 0.49 (0.30,0.81)                 | P=0.005 | 0.39 (0.26,0.59)     | P<0.001 | 0.53 (0.32,0.86)             | P=0.01  |
|             |                         |                     |         |                                                  |         |                              |         |                                  |         |                      |         |                              |         |
| 1970 cohort | Cognition               | 0.78 (0.64,0.94)    | P=0.01  | 0.80 (0.66,0.97)                                 | P=0.03  | 0.84 (0.69,1.03)             | P=0.1   | 0.85 (0.70,1.02)                 | P=0.08  | 0.80 (0.66,0.98)     | P=0.03  | 0.87 (0.72,1.05)             | P=0.15  |
|             | Quartile 1 (least able) | 1                   |         | 1                                                |         | 1                            |         | 1                                |         | 1                    |         | 1                            |         |
|             | Quartile 2              | 0.94 (0.48,1.82)    | P=0.85  | 0.97 (0.50,1.88)                                 | P=0.93  | 1.03 (0.52,2.03)             | P=0.93  | 1.0 (0.51,1.94)                  | P=0.99  | 0.97 (0.50,1.87)     | P=0.92  | 1.03 (0.52,2.02)             | P=0.93  |
|             | Quartile 3              | 0.71 (0.44,1.15)    | P=0.17  | 0.74 (0.46,1.21)                                 | P=0.24  | 0.82 (0.50,1.34)             | P=0.43  | 0.80 (0.50,1.29)                 | P=0.37  | 0.75 (0.46,1.22)     | P=0.24  | 0.82 (0.50,1.34)             | P=0.43  |
|             | Quartile 4 (most able)  | 0.44 (0.21,0.90)    | P=0.03  | 0.48 (0.24,0.98)                                 | P=0.04  | 0.56 (0.26,1.19)             | 0.13    | 0.57 (0.28,1.12)                 | P=0.10  | 0.48 (0.24,0.98)     | P=0.04  | 0.56 (0.26,1.19)             | P=0.13  |



## References

1. O.N.S. Labour Market Statistics - June 2011. London 2011.
2. Black C. Working for a healthier tomorrow. London: The Stationery Office 2008.
3. DWP. The Coalition: Our Programme for Government - Jobs and Welfare. London 2010.
4. Frost D, Black C. Health at Work - an independent review of sickness absence. London: Department for Work and Pensions 2011.
5. Head J, Ferrie JE, Alexanderson K, et al. Diagnosis-specific sickness absence as a predictor of mortality: the Whitehall II prospective cohort study. *BMJ* 2008;**337**:a1469.
6. Gjesdal S, Ringdal PR, Haug K, et al. Mortality after long-term sickness absence: prospective cohort study. *Eur J Public Health* 2008;**18**:517-21.
7. Vahtera J, Pentti J, Kivimaki M. Sickness absence as a predictor of mortality among male and female employees. *J Epidemiol Community Health* 2004;**58**:321-6.
8. Department for Work and Pensions. A new deal for welfare: Empowering people to work. London: DWP 2006.
9. Cattrell A, Harris EC, Palmer KT, et al. Regional trends in awards of incapacity benefit by cause. *Occupational medicine* 2011;**61**:148-51.
10. Henderson M, Harvey S, Overland S, et al. Work and common psychiatric disorders. *J R Soc Med* 2011;**104**:198-207.
11. Palmer KT, Walsh K, Bendall H, et al. Back pain in Britain: comparison of two prevalence surveys at an interval of 10 years. *BMJ* 2000;**320**:1577-8.
12. H.S.E. Statistics 2009/10. London: Health & Safety Executive 2010.
13. Office for National Statistics. Labour Force Survey. London: O.N.S., 2010.

- 1  
2  
3 14. Harvey S, Henderson M. Occupational Psychiatry. *Psychiatry* 2009;**8**:174-78.  
4  
5 15. Henderson M, Hotopf M, Leon D. Childhood temperament and long term sickness  
6  
7 absence in adult life. *Br J Psychiatry* 2009;**194**:220-23.  
8  
9  
10 16. Upmark M, Lundberg I, Sadigh J, et al. Conditions during childhood and adolescence as  
11  
12 explanations of social class differences in disability pension among young men. *Scand*  
13  
14 *J Public Health* 2001;**29**:96-103.  
15  
16 17. Gravseth HM, Bjerkedal T, Irgens LM, et al. Life course determinants for early disability  
17  
18 pension: a follow-up of Norwegian men and women born 1967-1976. *Eur J*  
19  
20 *Epidemiol* 2007;**22**:533-43.  
21  
22  
23 18. Gravseth HM, Bjerkedal T, Irgens LM, et al. Influence of physical, mental and  
24  
25 intellectual development on disability in young Norwegian men. *Eur J Public Health*  
26  
27 2008;**18**:650-5.  
28  
29  
30 19. Ferri J, Bynner J, Wadsworth M,(eds.) *Changing Britain, Changing Lives - Three*  
31  
32 *generations at the turn of the century*. London: Institute of Education, 2003.  
33  
34 20. Wadsworth M, Kuh D, Richards M, et al. Cohort Profile: The 1946 National Birth Cohort  
35  
36 (MRC National Survey of Health and Development). *Int J Epidemiol* 2006;**35**:49-54.  
37  
38  
39 21. Wadsworth ME, Butterworth SL, Hardy RJ, et al. The life course prospective design: an  
40  
41 example of benefits and problems associated with study longevity. *Soc Sci Med*  
42  
43 2003;**57**:2193-205.  
44  
45 22. Power C, Elliott J. Cohort profile: 1958 British birth cohort (National Child Development  
46  
47 Study). *Int J Epidemiol* 2006;**35**:34-41.  
48  
49  
50 23. Elliott J, Shepherd P. Cohort profile: 1970 British Birth Cohort (BCS70). *Int J Epidemiol*  
51  
52 2006;**35**:836-43.  
53  
54 24. Douglas JWB. *The Home and the School*. London: McGibbon and Kee, 1964.  
55  
56  
57  
58  
59  
60

- 1  
2  
3 25. Elliott C, Murray D, Pearson L. *British Ability Scales*. Windsor: National Foundation for  
4  
5 Educational Research, 1978.  
6  
7 26. Batty GD, Deary IJ, Schoon I, et al. Childhood mental ability in relation to cause-specific  
8  
9 accidents in adulthood: the 1970 British Cohort Study. *QJM* 2007;**100**:405-14.  
10  
11 27. Wing JK, Cooper JE, Sartorius N. *Measurement and classification of psychiatric*  
12  
13 *symptoms; an instruction manual for the PSE and Catego Program*. London:  
14  
15 Cambridge University Press, 1974.  
16  
17 28. Rutter M, Tizard J, Whitmore K. *Education, Health and Behaviour*. London: Longmans,  
18  
19 1970.  
20  
21 29. Cheung SY, Buchanan A. Malaise scores in adulthood of children and young people who  
22  
23 have been in care. *Journal of child psychology and psychiatry, and allied disciplines*  
24  
25 1997;**38**:575-80.  
26  
27 30. Goldberg D, Williams P. *A User's Guide to the General Health Questionnaire*. Windsor:  
28  
29 Nfer-Nelson, 1988.  
30  
31 31. Sproston K, Primatesta P. *Health Survey for England 2003*. London, 2004.  
32  
33 32. StataCorp. *Stata Statistical Software*. College Station, TX:Stata Corporation: Release 9.1,  
34  
35 2005.  
36  
37 33. Royston P. Multiple imputation of missing values. *Stata Journal* 2004;4(3):227-41.  
38  
39 34. Sterne JA, White IR, Carlin JB, et al. Multiple imputation for missing data in  
40  
41 epidemiological and clinical research: potential and pitfalls. *BMJ* 2009;338:b2393.  
42  
43 35. Batty GD, Deary IJ, Macintyre S. Childhood IQ in relation to risk factors for premature  
44  
45 mortality in middle-aged persons: the Aberdeen Children of the 1950s study. *J*  
46  
47 *Epidemiol Community Health* 2007;**61**:241-7.  
48  
49  
50  
51  
52  
53  
54  
55  
56  
57  
58  
59  
60

- 1  
2  
3 36. Der G, Batty GD, Deary IJ. The association between IQ in adolescence and a range of  
4 health outcomes at 40 in the 1979 US National Longitudinal Study of Youth.  
5  
6 *Intelligence* 2009;**37**:573-80.  
7  
8  
9  
10 37. Kuh D, Richards M, Hardy R, et al. Childhood cognitive ability and deaths up until  
11 middle age: a post-war birth cohort study. *Int J Epidemiol* 2004;**33**:408-13.  
12  
13  
14 38. Richards M, Stephen AM, Mishra G. Health returns to cognitive capital in the British  
15 1946 birth cohort. *Longitudinal and lifecourse studies* 2010;**1**:281-96.  
16  
17  
18 39. Chandola T, Deary IJ, Blane D, et al. Childhood IQ in relation to obesity and weight gain  
19 in adult life: the National Child Development (1958) Study. *International Journal of*  
20 *Obesity* 2006;**30**:1422-32.  
21  
22  
23  
24 40. Gale CR, Johnson W, Deary IJ, et al. Intelligence in girls and their subsequent smoking  
25 behaviour as mothers: the 1958 National Child Development Study and the 1970  
26 British Cohort Study. *Int J Epidemiol* 2009;**38**:173-81.  
27  
28  
29  
30 41. Power C, Jefferis BJ, Manor O. Childhood cognition and risk factors for cardiovascular  
31 disease in midadulthood: the 1958 British Birth Cohort Study. *Am J Public*  
32 *Health*;**100**:129-36.  
33  
34  
35  
36  
37  
38 42. Gottfredson LS, Deary IJ. Intelligence predicts health and longevity, but why? *Current*  
39 *Directions in Psychological Science* 2004;**13**:1-4.  
40  
41  
42  
43  
44  
45  
46  
47  
48  
49  
50  
51  
52  
53  
54  
55  
56  
57  
58  
59  
60

## WHAT IS ALREADY KNOWN ON THIS SUBJECT

- Mental ill health and musculoskeletal disorders are the most common diagnoses in people on long term sick leave.
- However, the associations between objective measures of health and long term sick leave are weak
- Most research has focussed on occupational risk factors for sickness absence, such as the psychosocial work environment.
- Relatively little research has examined the role of individual risk factors

## WHAT THIS STUDY ADDS

- There is a clear dose-response relationship between lower cognitive function in childhood and increased odds of being on long term sick leave in adulthood.
- This association applies to younger as well as older workers, and holds true irrespective of the decade of birth.
- This association is mediated in part by education attainment suggesting improved education, especially for those with lower cognitive abilities, may help inoculate them from the risk of long term sickness absence.

## COPYRIGHT

“The Corresponding Author has the right to grant on behalf of all authors and does grant on behalf of all authors, a worldwide licence to the Publishers and its licensees in perpetuity, in all forms, formats and media (whether known now or created in the future), to i) publish, reproduce, distribute, display and store the Contribution, ii) translate the Contribution into other languages, create adaptations, reprints, include within collections and create summaries, extracts and/or, abstracts of the Contribution, iii) create any other derivative work(s) based on the Contribution, iv) to exploit all subsidiary rights in the Contribution, v) the inclusion of electronic links from the Contribution to third party material where-ever it may be located; and, vi) licence any third party to do any or all of the above.”

## COMPETING INTERESTS

"All authors have completed the Unified Competing Interest form at [www.icmje.org/coi\\_disclosure.pdf](http://www.icmje.org/coi_disclosure.pdf) (available on request from the corresponding author) and declare: no support from any organisation for the submitted work; no financial relationships with any organisations that might have an interest in the submitted work in the previous 3 years; no other relationships or activities that could appear to have influenced the submitted work."

## CONTRIBUTORS

Henderson, Hotopf and Stansfeld conceived the study. Henderson Hotopf and Richards analysed the data. Henderson Hotopf Stansfeld and Richards interpreted the results. Henderson drafted the manuscript. Hotopf Stansfeld and Richards critically revised the manuscript for important intellectual content.

All authors approved the final version.

Henderson is the guarantor.

1  
2  
3 ETHICAL APPROVAL  
4  
5

6 Not required for this study.  
7  
8  
9

10  
11 ACKNOWLEDGEMENTS  
12

13 We are grateful to all the participants of each cohort study. We acknowledge the support of Imran  
14 Shah at the National Survey of Health and Development in providing us with data.  
15  
16  
17  
18  
19

20  
21 FUNDING  
22

23  
24 Dr Henderson received support from a Medical Research Council Research Training Fellowship in  
25 Health Services and Health of the Public Research. He is now supported by the NIHR Biomedical  
26 Research Centre BRC Nucleus jointly funded by the Guys and St Thomas' Charity and the South  
27 London and Maudsley Trustees. Professor Hotopf is supported by the NIHR Biomedical Research  
28 Centre for Mental Health at the South London and Maudsley NHS Foundation Trust and Institute of  
29 Psychiatry, Kings College London.  
30  
31  
32  
33  
34  
35

36  
37 All authors confirm that this research was carried out independent of the funders.  
38  
39  
40  
41  
42  
43  
44  
45  
46  
47  
48  
49  
50  
51  
52  
53  
54  
55  
56  
57  
58  
59  
60

RESEARCH CHECKLIST: The association between childhood cognitive ability and long term sickness absence in 3 British birth cohorts

|                           | Item No | Recommendation                                                                                                                                                                                                                                                          | Page no. in paper |
|---------------------------|---------|-------------------------------------------------------------------------------------------------------------------------------------------------------------------------------------------------------------------------------------------------------------------------|-------------------|
| <b>Title and abstract</b> | 1       | (a) Indicate the study's design with a commonly used term in the title or the abstract                                                                                                                                                                                  | 1                 |
|                           |         | (b) Provide in the abstract an informative and balanced summary of what was done and what was found                                                                                                                                                                     | 2                 |
| <b>Introduction</b>       |         |                                                                                                                                                                                                                                                                         |                   |
| Background/rationale      | 2       | Explain the scientific background and rationale for the investigation being reported                                                                                                                                                                                    | 3-4               |
| Objectives                | 3       | State specific objectives, including any prespecified hypotheses                                                                                                                                                                                                        | 4                 |
| <b>Methods</b>            |         |                                                                                                                                                                                                                                                                         |                   |
| Study design              | 4       | Present key elements of study design early in the paper                                                                                                                                                                                                                 | 4                 |
| Setting                   | 5       | Describe the setting, locations, and relevant dates, including periods of recruitment, exposure, follow-up, and data collection                                                                                                                                         | 4-7               |
| Participants              | 6       | (a) Give the eligibility criteria, and the sources and methods of selection of participants. Describe methods of follow-up<br><br><i>Author note: Our study used data from 3 British birth cohorts, all of which have been extensively investigated and reported on</i> | 4-5               |
|                           |         | (b) For matched studies, give matching criteria and number of exposed and unexposed                                                                                                                                                                                     | NA                |
| Variables                 | 7       | Clearly define all outcomes, exposures, predictors, potential confounders, and effect modifiers. Give diagnostic criteria, if applicable                                                                                                                                |                   |
| Data sources/measurement  | 8*      | For each variable of interest, give sources of data and details of methods of assessment (measurement). Describe comparability of assessment methods if there is more than one group                                                                                    | 5-7               |
| Bias                      | 9       | Describe any efforts to address potential sources of bias                                                                                                                                                                                                               | 9-10              |
| Study size                | 10      | Explain how the study size was arrived at<br><br><i>Author note: we used data from 3 well established birth cohorts and have cited detailed descriptions of each</i>                                                                                                    |                   |
|                           |         |                                                                                                                                                                                                                                                                         |                   |
| Quantitative variables    | 11      | Explain how quantitative variables were handled in the analyses. If applicable, describe which groupings were chosen and why                                                                                                                                            | 6-7               |
| Statistical methods       | 12      | (a) Describe all statistical methods, including those used to control for confounding                                                                                                                                                                                   | 7                 |
|                           |         | (b) Describe any methods used to examine subgroups and interactions                                                                                                                                                                                                     | n/a               |
|                           |         | (c) Explain how missing data were addressed                                                                                                                                                                                                                             | 7                 |
|                           |         | (d) If applicable, explain how loss to follow-up was addressed                                                                                                                                                                                                          | 7                 |
|                           |         | (e) Describe any sensitivity analyses                                                                                                                                                                                                                                   | None              |



| <b>Results</b>           |     |                                                                                                                                                                                                                                                                                                                                                                                                                                                                                                                                                                                               |                    |
|--------------------------|-----|-----------------------------------------------------------------------------------------------------------------------------------------------------------------------------------------------------------------------------------------------------------------------------------------------------------------------------------------------------------------------------------------------------------------------------------------------------------------------------------------------------------------------------------------------------------------------------------------------|--------------------|
| Participants             | 13* | (a) Report numbers of individuals at each stage of study—eg numbers potentially eligible, examined for eligibility, confirmed eligible, included in the study, completing follow-up, and analysed<br><br>(b) Give reasons for non-participation at each stage<br><br>(c) Consider use of a flow diagram<br><br><i>Author note: we cite “About the cohort” papers for all 3 cohorts in addition to Professor Wadsworth’s book which provides further information. We would happily include further information in the paper if required but with 3 birth cohorts we felt this was too much</i> | 8                  |
| Descriptive data         | 14* | (a) Give characteristics of study participants (eg demographic, clinical, social) and information on exposures and potential confounders<br><br>(b) Indicate number of participants with missing data for each variable of interest<br><br>(c) Summarise follow-up time (eg, average and total amount)                                                                                                                                                                                                                                                                                        | 13<br><br><br>n/a  |
| Outcome data             | 15* | Report numbers of outcome events or summary measures over time                                                                                                                                                                                                                                                                                                                                                                                                                                                                                                                                | 8                  |
| Main results             | 16  | (a) Give unadjusted estimates and, if applicable, confounder-adjusted estimates and their precision (eg, 95% confidence interval). Make clear which confounders were adjusted for and why they were included<br><br>(b) Report category boundaries when continuous variables were categorized<br><br>(c) If relevant, consider translating estimates of relative risk into absolute risk for a meaningful time period                                                                                                                                                                         | 13<br><br>NA<br>NA |
| Other analyses           | 17  | Report other analyses done—eg analyses of subgroups and interactions, and sensitivity analyses                                                                                                                                                                                                                                                                                                                                                                                                                                                                                                | None               |
| <b>Discussion</b>        |     |                                                                                                                                                                                                                                                                                                                                                                                                                                                                                                                                                                                               |                    |
| Key results              | 18  | Summarise key results with reference to study objectives                                                                                                                                                                                                                                                                                                                                                                                                                                                                                                                                      | 8-9                |
| Limitations              | 19  | Discuss limitations of the study, taking into account sources of potential bias or imprecision. Discuss both direction and magnitude of any potential bias                                                                                                                                                                                                                                                                                                                                                                                                                                    | 9-10               |
| Interpretation           | 20  | Give a cautious overall interpretation of results considering objectives, limitations, multiplicity of analyses, results from similar studies, and other relevant evidence                                                                                                                                                                                                                                                                                                                                                                                                                    | 11-12              |
| Generalisability         | 21  | Discuss the generalisability (external validity) of the study results                                                                                                                                                                                                                                                                                                                                                                                                                                                                                                                         | 11-12              |
| <b>Other information</b> |     |                                                                                                                                                                                                                                                                                                                                                                                                                                                                                                                                                                                               |                    |
| Funding                  | 22  | Give the source of funding and the role of the funders for the present study and, if applicable, for the original study on which the present article is based                                                                                                                                                                                                                                                                                                                                                                                                                                 | 19                 |

\*Give information separately for exposed and unexposed groups.

1 **Note:** An Explanation and Elaboration article discusses each checklist item and gives methodological background and  
2 published examples of transparent reporting. The STROBE checklist is best used in conjunction with this article (freely  
3 available on the Web sites of PLoS Medicine at <http://www.plosmedicine.org/>, Annals of Internal Medicine at  
4 <http://www.annals.org/>, and Epidemiology at <http://www.epidem.com/>). Information on the STROBE Initiative is  
5 available at <http://www.strobe-statement.org>.  
6  
7  
8  
9  
10  
11  
12  
13  
14  
15  
16  
17  
18  
19  
20  
21  
22  
23  
24  
25  
26  
27  
28  
29  
30  
31  
32  
33  
34  
35  
36  
37  
38  
39  
40  
41  
42  
43  
44  
45  
46  
47  
48  
49  
50  
51  
52  
53  
54  
55  
56  
57  
58  
59  
60

For peer review only
